# Supplementary material
Source: PubMed Central journal article supplement (PMC3248280)
Supplement: JCI44927sd.pdf [file JCI44927sd.pdf]

## **Online Data Supplements**

### **Supplemental Methods**

#### **Bioinformatic Analysis of Gene Expression Profile.**

Biological networks of the differentially expressed genes were generated with Ingenuity pathway analysis (IPA) tools (Ingenuity Systems Inc.). The list of differentially expressed genes from Polony Multiplex Analysis of Gene Expression (PMAGE) was imported into Ingenuity and each gene identifier was overlaid onto a global molecular network developed from information contained in the Ingenuity Pathways Knowledge Base. Networks of these genes were then generated based on their connectivity.

#### **Proteomic Screening with Protein Interaction Pull-down Assay.**

The Txnip coding sequence was subcloned into pCDH-CMV-MCS-EF1-Puro (System Biosciences, Mountain View, CA) with a glutathione S-transferase (GST) tag and transduced into HEK293F cells. Cells expressing GST alone were used as a negative control. Cells were lysed in 0.5% Triton X-100, 150 mM NaCl, 50 mM Tris, 1 mM phenylmethanesulfonylfluoride, and protease inhibitors (Sigma-Aldrich, St. Louis, MO), pH 7.4. Txnip pulldown was performed using magnetic glutathione beads (Thermo Fisher Scientific, Rockford, IL) according to the

manufacturer's instructions. Pulled down proteins were subjected to SDS-PAGE and analyzed by mass spectrometry.

### **Assays for Oxidative Phosphorylation (OXPHOS) Complexes.**

Protein levels of total oxidative phosphorylation (OXPHOS) complexes were detected with immunoblotting analysis using the monoclonal antibody cocktail from MitoProfile Rodent Total OXPHOS Complexes Detection Kit (MitoSciences Inc., Eugene, OR). Mouse heart mitochondria were also separated by blue native gel electrophoresis and stained with Coomassie blue to visualize respiratory complexes. Quantitative analyses of complex III and IV activities were performed using MitoTox OXPHOS Complex III Activity Kit and MitoProfile Rapid Microplate Assay Kit for Mouse Complex IV Activity (MitoSciences Inc., Eugene, OR), respectively. It should be noted that, in this Complex III assay, the enzymatic reaction is partially affected by the activity of complex II.

### **Mitochondrial Permeability Transition Pore Opening.**

Mitochondrial permeability transition pore opening was determined by mitochondrial swelling (1). Osmotic swelling was induced by addition of 250  $\mu\text{M}$   $\text{CaCl}_2$ , and measured by

decrease in absorbance at 540 nm using 96-well plate reader (Molecular Devices Inc., Sunnyvale, CA). Glutathione-induced mitochondrial swelling was also assessed by addition of 10 mM reduced glutathione (2).

#### **Binding Assay of Thioredoxin-2 to Txnip.**

The binding assay was performed as described (3). Briefly, mitochondrial thioredoxin-2 cDNA was subcloned into pGEX-4T3 (Amersham Biosciences), carboxyl-terminal to glutathione S-transferase (GST). GST fusion proteins were induced in *E.coli* BL21 cells and cellular lysates were incubated with glutathione-Sepharose 4B beads (Bio-World, Dublin, OH). Txnip was overexpressed in HEK 293 cells using a mammalian overexpression vector (pcDNA3.1/V5/His, Invitrogen) and FuGENE (Roche Applied Science) transfection reagent. For GST binding, HEK 293 cells lysates were incubated with beads containing equal amounts of GST protein. Binding proceeded overnight and bound proteins were released by boiling in gel-loading sample buffer. Protein samples were electrophoresed and the immune-complex between Txnip and thioredoxin-2 was detected using our monoclonal Txnip antibody JY2 (available from MLB International, Woburn, MA).

## Supplemental Results and Discussion

### Ingenuity Pathway Analysis Reveals Putative Downstream Targets Responding to

#### Cardiometabolic Effects by Txnip.

The results of the network reconstruction by Ingenuity and connectivity map of the responses are shown in Supplemental Figure 1. Ingenuity network analysis found two significant networks (Supplemental Figure 1A and 1B). The p statistics for significance were  $1 \times 10^{-50}$  and  $1 \times 10^{-38}$ , respectively. In the networks, red and green indicate up- and down-regulation of gene expression, respectively, while grey indicates no information or no change. As shown in network 1, the downstream partner genes include retinoid X receptor  $\alpha$  (RXRA), which has been shown to interact with peroxisome proliferator-activated receptor gamma coactivator 1- $\alpha$  (PGC-1 $\alpha$ ) that regulates the genes involved in energy metabolism and mitochondrial biogenesis. Recently, it has been reported that Txnip binds Myb-binding protein 1a (Mybbp1a) which inhibits PGC-1 $\alpha$  function (4). Thus, down-regulation of PGC-1 $\alpha$  might be a mechanism through which deletion of Txnip leads to decreased levels of multiple molecules participating in several central metabolic pathways. Among the other fundamental cardiac components, p38 MAPK and peroxisome proliferator-activated receptor gamma coactivator 1- $\beta$  (PPARGC1B) may be the interface components associated with mitochondrial metabolism in network 2. Glycogen synthase was also among the genes constituting

network 2 and was significantly down-regulated by deletion of Txnip at the level of transcription.

Thus, the Ingenuity Pathway analysis suggested putative downstream targets responding to potential cardiometabolic effects by Txnip, although the precise molecular mechanism of how deletion of Txnip controls these multiple networks remains unclear.

### **Txnip-KO Mitochondria Have Comparable Calcium Capacity with Wild Type Mitochondria.**

The import of Ca<sup>2+</sup> from cytosol into cardiac mitochondria is an important regulatory event in cell signaling. Calcium efflux occurs with mitochondrial permeability transition pore opening, and the activation of the permeability transition pore with mitochondrial calcium flux plays a role in early myocardial ischemia-reperfusion injury (5). We directly compared the effects of exposure to Ca<sup>2+</sup> in mitochondria between isolated from Txnip-KO and wild type hearts. Supplemental Figure 2E shows absorbance changes after the addition of 250 μM CaCl<sub>2</sub> to mitochondria. Exposure to Ca<sup>2+</sup> led to a large decrease in the absorbance to the same extent in wild type and Txnip-KO mitochondria, indicating that Txnip-KO and wild type mitochondria have comparable calcium capacities. We also compared the effects of exposure to glutathione. As shown in Supplemental Figure 2F, glutathione-dependent swelling of mitochondria was comparable between Txnip-KO mice and wild type mice. Thus, Txnip-KO mitochondria show no difference in

the sensitivity of mitochondrial permeability transition pore opening compared to wild type mitochondria.

## Supplemental Figure Legends

**Supplemental Figure 1.** Ingenuity pathway analysis (IPA) gene networks. Biological networks of the differentially expressed genes were generated in Ingenuity pathway analysis tools (Ingenuity Systems Inc.). The intensity of colors indicates the degree of up-regulation (red) or down-regulation (green), and grey indicates no information or no change. Node (gene) symbols are described. The p statistics for significance of Network 1 (**A**) and Network 2 (**B**) were  $1 \times 10^{-50}$  and  $1 \times 10^{-38}$ , respectively. The networks contain genes such as retinoid X receptor  $\alpha$  (RXRA), peroxisome proliferator-activated receptor gamma coactivator 1- $\beta$  (PPARGC1B) and other signaling molecules.

**Supplemental Figure 2.** (**A**) Complex III activity was measured by monitoring the conversion of cytochrome *c* in its oxidized form to its reduced form, as a linear increase in absorbance at 550 nm. (**B**) Complex IV activity was determined by the oxidation of reduced cytochrome *c* in isolated mitochondria (n=6 each). Values are mean $\pm$ SEM. (**C**) Immunoblotting analysis was performed using a monoclonal antibody cocktail for the OXPHOS complex. (**D**) Multiprotein complexes from mouse heart mitochondria were separated by blue-native PAGE, and probed with a monoclonal antibody cocktail for the OXPHOS complex. (**E**) Calcium-sensitive osmotic swelling was induced by 250  $\mu$ M  $\text{CaCl}_2$  and measured by decrease in absorbance at 540 nm using 96-well plate reader (Molecular

Device Inc., Sunnyvale, CA). (F) Glutathione-induced mitochondrial swelling was also assessed by addition of 10 mM reduced glutathione. (G) Binding assay confirmed that Txnip can interact with thioredoxin-2. Txnip protein was overexpressed in HEK293 cells by transfection, and the cell lysates were incubated with thioredoxin-2-GST beads. After washing, beads were incubated in sample buffer and the supernatant was probed with anti-Txnip antibody. Protein expression of thioredoxin-2 was confirmed by Coomassie Blue Stain. Cells without Txnip overexpression were used as a control.



### Supplemental References

1. Zhao K, et al. Cell-permeable peptide antioxidants targeted to inner mitochondrial membrane inhibit mitochondrial swelling, oxidative cell death, and reperfusion injury. *J Biol Chem.* 2004;279(33):34682-34690.
2. Lehninger AL, Schneider M. Mitochondrial swelling induced by glutathione. *J Biophys Biochem Cytol.* 1959;5(1):109-116.
3. Patwari P, Higgins LJ, Chutkow WA, Yoshioka J, Lee RT. The interaction of thioredoxin with Txnip. Evidence for formation of a mixed disulfide by disulfide exchange. *J Biol Chem.* 2006;281(31):21884-21891.
4. Yoshihara E, et al. Disruption of TBP-2 ameliorates insulin sensitivity and secretion without affecting obesity. *Nat Commun.* 2010;1:127.
5. Marin-Garcia J, Goldenthal MJ. Heart mitochondria signaling pathways: appraisal of an emerging field. *J Mol Med (Berl).* 2004;82(9):565-578.

# Supplemental Figure 1

## A Interaction Network 1

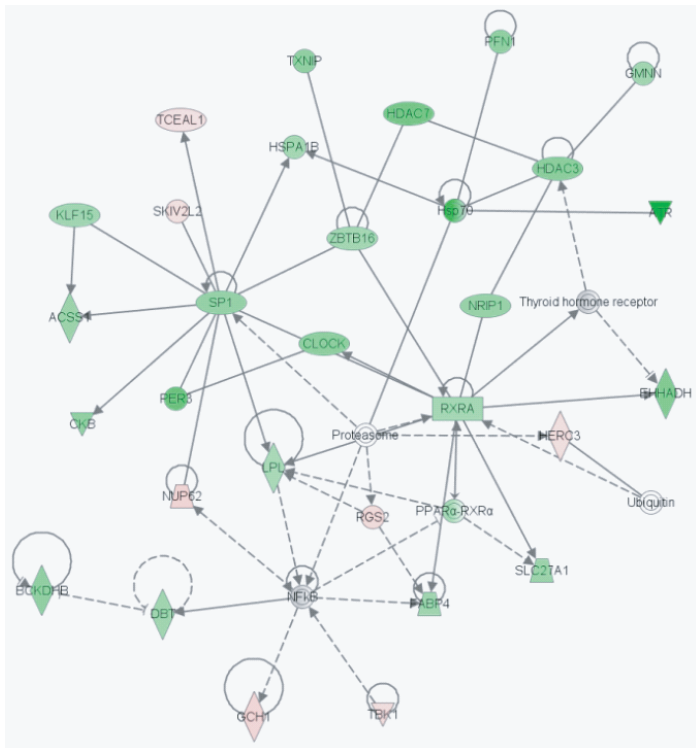

## B Interaction Network 2

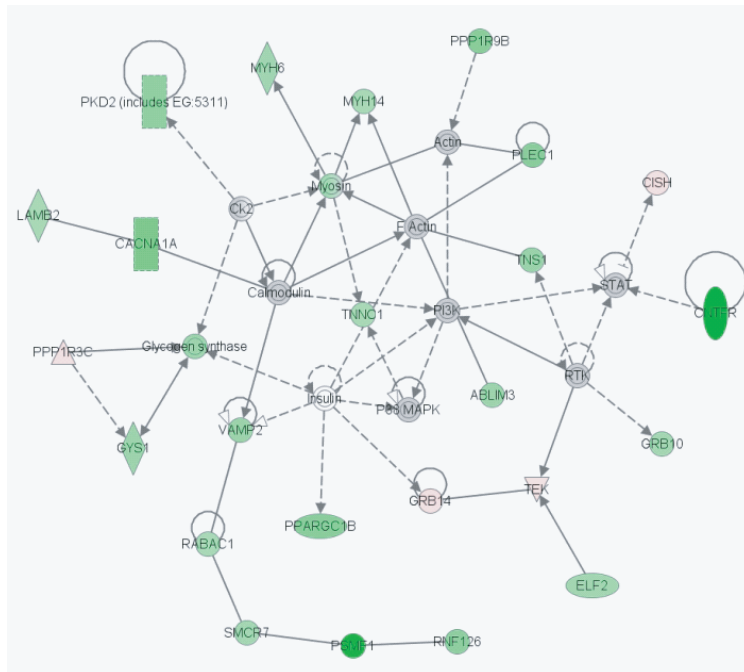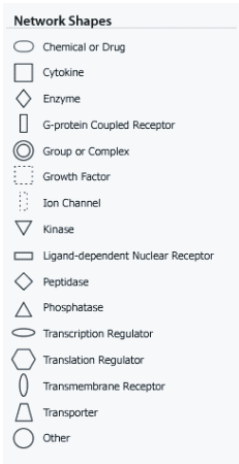

| Symbol  | Gene                                                               |
|---------|--------------------------------------------------------------------|
| Ablin3  | Actin binding LIM protein family, member 3                         |
| Acss1   | Acyl-CoA synthetase short-chain family member 1                    |
| Atr     | Ataxia telangiectasia and Rad3 related                             |
| Bckdmb  | Branched chain ketoadic dehydrogenase E1, beta polypeptide         |
| Cacna1a | cDNA sequence BY080835                                             |
| Cish    | Cytokine inducible SH2-containing protein                          |
| Ck2     | Creatine kinase, mitochondrial 2                                   |
| Ckb     | Creatine kinase, brain                                             |
| Clock   | Circadian locomotor output cycles kaput                            |
| Cnfr    | Ciliary neurotrophic factor receptor                               |
| Dbt     | Dihydroalpoamide branched chain transacylase E2                    |
| Ehadh   | Enoyl-Coenzyme A, hydratase/3-hydroxyacyl Coenzyme A dehydrogenase |
| Elf2    | E74-like factor 2                                                  |
| Fabp4   | Fatty acid binding protein 4, adipocyte                            |
| Gch1    | GTP cyclohydrolase 1                                               |
| Gmnn    | Geminin                                                            |
| Grb10   | Growth factor receptor bound protein 10                            |
| Grb14   | Growth factor receptor bound protein 14                            |
| Gys1    | Glycogen synthase 1, muscle                                        |
| Hdac3   | Histone deacetylase 3                                              |
| Hdac7a  | Histone deacetylase 7A                                             |
| Herc3   | Hectdomain and RLD 3                                               |
| Hspa1b  | Heat shock 70kDa protein 1B                                        |
| Klf15   | Kruppel-like factor 15                                             |
| Lamb2   | Laminin, beta 2                                                    |
| Lpl     | Lipoprotein lipase                                                 |
| Myh14   | Myosin heavy polypeptide 14                                        |

| Symbol   | Gene                                                                   |
|----------|------------------------------------------------------------------------|
| Myh6     | Myosin heavy polypeptide 6, cardiac muscle, alpha                      |
| Nrip1    | Nuclear receptor interacting protein 1                                 |
| Nup62    | Nucleoporin 62                                                         |
| Per3     | Period homolog 3 (Drosophila)                                          |
| Phn1     | Profilin 1                                                             |
| Pkd2     | Polycystic kidney disease 2                                            |
| Plec1    | Plectin 1                                                              |
| Ppargc1b | Peroxisome proliferative activated receptor, gamma, coactivator 1 beta |
| Ppp1r3c  | Protein phosphatase 1, regulatory (inhibitor) subunit 3C               |
| Ppp1r9b  | Protein phosphatase 1, regulatory subunit 9B                           |
| Psmf1    | Proteasome (prosome, macropain) inhibitor subunit 1 (P31)              |
| Rabac1   | Rab activator 1 (prenylated)                                           |
| Rgs2     | Regulator of G-protein signaling 2                                     |
| Rnf126   | Ring finger protein 126                                                |
| Rxra     | Retinoid X receptor alpha                                              |
| Skiv2l2  | Superkiller viralicidic activity 2-like 2 (S. cerevisiae)              |
| Slc27a1  | Solute carrier family 27 (fatty acid transporter), member 1            |
| Smc7     | Smith-Magenis syndrome chromosome region, candidate 7 homolog (human)  |
| Sp1      | Trans-acting transcription factor 1                                    |
| Tbk1     | TANK-binding kinase 1                                                  |
| Tceal1   | Transcription elongation factor A (SII)-like 1                         |
| Tek      | Endothelial-specific receptor tyrosine kinase                          |
| Tnnc1    | Troponin C, cardiac/slow skeletal                                      |
| Tns1     | Tensin 1                                                               |
| Vamp2    | Vesicle-associated membrane protein 2                                  |
| Zbtb16   | Zinc finger and BTB domain containing 16                               |

**Supplemental Figure 1.** Ingenuity pathway analysis (IPA) gene networks. Biological networks of the differentially expressed genes were generated in Ingenuity pathway analysis tools (Ingenuity Systems Inc.). The intensity of colors indicates the degree of up-regulation (red) or down-regulation (green), and grey indicates no information or no change. Node (gene) symbols are described. The p statistics for significance of Network 1 (A) and Network 2 (B) were  $1 \times 10^{-50}$  and  $1 \times 10^{-38}$ , respectively. The networks contain genes such as retinoid X receptor  $\alpha$  (RXRA), peroxisome proliferator-activated receptor gamma coactivator 1- $\beta$  (PPARGC1B) and other signaling molecules.

## Supplemental Figure 2

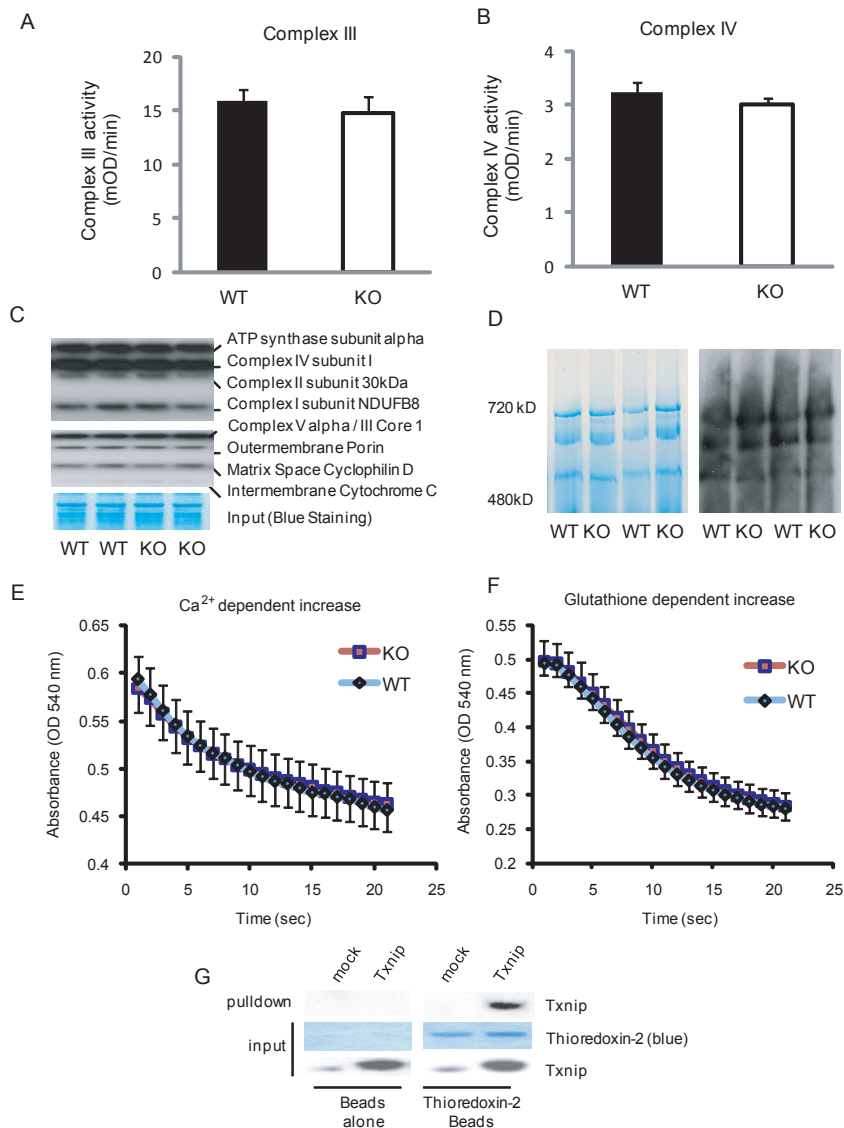

**Supplemental Figure 2.** (A) Complex III activity was measured by monitoring the conversion of cytochrome *c* in its oxidized form to its reduced form, as a linear increase in absorbance at 550 nm. (B) Complex IV activity was determined by the oxidation of reduced cytochrome *c* in isolated mitochondria (n=6 each). Values are mean±SEM. (C) Immunoblotting analysis was performed using a monoclonal antibody cocktail for the OXPHOS complex. (D) Multiprotein complexes from mouse heart mitochondria were separated by blue-native PAGE, and probed with a monoclonal antibody cocktail for the OXPHOS complex. (E) Calcium-sensitive osmotic swelling was induced by 250  $\mu$ M  $\text{CaCl}_2$  and measured by decrease in absorbance at 540 nm using 96-well plate reader (Molecular Device Inc., Sunnyvale, CA). (F) Glutathione-induced mitochondrial swelling was also assessed by addition of 10 mM reduced glutathione. (G) Binding assay confirmed that Txnip can interact with thioredoxin-2. Txnip protein was overexpressed in HEK293 cells by transfection, and the cell lysates were incubated with thioredoxin-2-GST beads. After washing, beads were incubated in sample buffer and the supernatant was probed with anti-Txnip antibody. Protein expression of thioredoxin-2 was confirmed by Coomassie Blue Stain. Cells without Txnip overexpression were used as a control.

## Supplemental Table 1

Differentially-regulated genes for dehydrogenases, oxidoreductases, and enzymes controlling oxidative phosphorylation/electron transport are highlighted in red.

| NCBI<br>Unigene Symbol | Gene Name                                                                                     | Normalized Tag Count |           |            | KOWT<br>Fold<br>Change | P-value          |
|------------------------|-----------------------------------------------------------------------------------------------|----------------------|-----------|------------|------------------------|------------------|
|                        |                                                                                               | WT                   | Txnip-KO  | Total      |                        |                  |
| Pars2                  | prolyl-tRNA synthetase 2, mitochondrial (putative)                                            | 12                   | 1         | 13         | -12                    | 0.0000135        |
| Zfp385b                | zinc finger protein 385B                                                                      | 11                   | 1         | 12         | -11                    | 0.0001676        |
| 4833426J09Rik          | RIKEN cDNA 4833426J09 gene                                                                    | 10                   | 1         | 11         | -10                    | 0.0003808        |
| C1qtnf1                | C1q and tumor necrosis factor related protein 1                                               | 10                   | 1         | 11         | -10                    | 0.0003808        |
| Cnr1                   | Cannabinoid receptor 1 (brain)                                                                | 19                   | 2         | 21         | -9.5                   | 0.0000008        |
| <b>Bdh1</b>            | <b>3-hydroxybutyrate dehydrogenase, type 1</b>                                                | <b>148</b>           | <b>16</b> | <b>164</b> | <b>-9.25</b>           | <b>0.0000000</b> |
| Dcp1b                  | DCP1 decapping enzyme homolog b ( <i>S. cerevisiae</i> )                                      | 9                    | 1         | 10         | -9                     | 0.0008580        |
| Mm.400598              | Transcribed locus                                                                             | 8                    | 1         | 9          | -8                     | 0.0004556        |
| Itga3                  | Integrin, alpha 3 (antigen CD49C, alpha 3 subunit of VLA-3 receptor)                          | 8                    | 1         | 9          | -8                     | 0.0010832        |
| Lonrf2                 | LON peptidase N-terminal domain and ring finger 2                                             | 8                    | 1         | 9          | -8                     | 0.0010832        |
| Hfe2                   | Hemochromatosis type 2 (juvenile) (human homolog)                                             | 256                  | 40        | 296        | -6.4                   | 0.0000000        |
| Adamts15               | A disintegrin-like and metallopeptidase (repolysin type) with thrombospondin type 1 motif, 15 | 15                   | 3         | 18         | -5                     | 0.0003413        |
| Pdia5                  | Protein disulfide isomerase associated 5                                                      | 10                   | 2         | 12         | -5                     | 0.0013050        |
| Cntfr                  | Ciliary neurotrophic factor receptor                                                          | 28                   | 6         | 34         | -4.66                  | 0.0000011        |
| Mm.367626              | Transcribed locus                                                                             | 32                   | 7         | 39         | -4.57                  | 0.0000002        |
| Abat                   | 4-aminobutyrate aminotransferase                                                              | 22                   | 5         | 27         | -4.4                   | 0.0000215        |
| Ssh3                   | Slingshot homolog 3 ( <i>Drosophila</i> )                                                     | 16                   | 4         | 20         | -4                     | 0.0009254        |
| Atr                    | Ataxia telangiectasia and Rad3 related                                                        | 12                   | 3         | 15         | -4                     | 0.0021816        |
| Zfp697                 | Zinc finger protein 697                                                                       | 23                   | 6         | 29         | -3.83                  | 0.0001223        |
| Ei24                   | Etoposide induced 2.4 mRNA                                                                    | 87                   | 23        | 110        | -3.78                  | 0.0000000        |
| Psmf1                  | Proteasome (prosome, macropain) inhibitor subunit 1 (PI31)                                    | 15                   | 4         | 19         | -3.75                  | 0.0017306        |
| Lsm6                   | LSM6 homolog, U6 small nuclear RNA associated ( <i>S. cerevisiae</i> )                        | 29                   | 8         | 37         | -3.62                  | 0.0000297        |
| Ctso                   | Cathepsin O                                                                                   | 21                   | 6         | 27         | -3.5                   | 0.0004045        |
| Sergef                 | Secretion regulating guanine nucleotide exchange factor                                       | 21                   | 6         | 27         | -3.5                   | 0.0004045        |
| Evc2                   | Ellis van Creveld syndrome 2 homolog (human)                                                  | 14                   | 4         | 18         | -3.5                   | 0.0015405        |
| Armc2                  | armadillo repeat containing 2                                                                 | 38                   | 11        | 49         | -3.45                  | 0.0000007        |
| Hook1                  | Hook homolog 1 ( <i>Drosophila</i> )                                                          | 34                   | 10        | 44         | -3.4                   | 0.0000066        |
| Dis3                   | DIS3 mitotic control homolog ( <i>S. cerevisiae</i> )                                         | 17                   | 5         | 22         | -3.4                   | 0.0020353        |
| BY080835               | cDNA sequence BY080835                                                                        | 20                   | 6         | 26         | -3.33                  | 0.0003716        |
| Hspa1a                 | Heat shock protein 1A                                                                         | 73                   | 22        | 95         | -3.31                  | 0.0000000        |
| Jup                    | Junction plakoglobin                                                                          | 255                  | 78        | 333        | -3.26                  | 0.0000000        |
| 2410001C21Rik          | RIKEN cDNA 2410001C21 gene                                                                    | 29                   | 9         | 38         | -3.22                  | 0.0000570        |
| Slc39a13               | Solute carrier family 39 (metal ion transporter), member 13                                   | 29                   | 9         | 38         | -3.22                  | 0.0000570        |
| Eif3s9                 | eukaryotic translation initiation factor 3, subunit 9                                         | 32                   | 10        | 42         | -3.2                   | 0.0000209        |
| Pex12                  | Peroxisomal biogenesis factor 12                                                              | 16                   | 5         | 21         | -3.2                   | 0.0018957        |
| Fah                    | Fumarylacetoacetate hydrolase                                                                 | 185                  | 58        | 243        | -3.18                  | 0.0000000        |
| Bbx                    | Bobby sox homolog ( <i>Drosophila</i> )                                                       | 28                   | 9         | 37         | -3.11                  | 0.0001002        |
| Gdpd3                  | Glycerophosphodiester phosphodiesterase domain containing 3                                   | 28                   | 9         | 37         | -3.11                  | 0.0001002        |
| Ccb12                  | Cysteine conjugate-beta lyase 2                                                               | 66                   | 22        | 88         | -3                     | 0.0000000        |
| Crip1                  | Cysteine-rich protein 1 (intestinal)                                                          | 51                   | 17        | 68         | -3                     | 0.0000005        |
| <b>Scd1</b>            | <b>Stearoyl-Coenzyme A desaturase 1</b>                                                       | <b>27</b>            | <b>9</b>  | <b>36</b>  | <b>-3</b>              | <b>0.0001745</b> |
| Ddt                    | D-dopachrome tautomerase                                                                      | 27                   | 9         | 36         | -3                     | 0.0003107        |
| Caskin2                | Cask-interacting protein 2                                                                    | 24                   | 8         | 32         | -3                     | 0.0008536        |
| Zrsr2                  | zinc finger (CCCH type), RNA-binding motif and serine/arginine rich 2                         | 24                   | 8         | 32         | -3                     | 0.0008536        |
| Zcchc17                | Zinc finger, CCHC domain containing 17                                                        | 32                   | 11        | 43         | -2.9                   | 0.0000385        |
| Cpsf4                  | Cleavage and polyadenylation specific factor 4                                                | 29                   | 10        | 39         | -2.9                   | 0.0001879        |
| BC020535               | CDNA sequence BC020535                                                                        | 20                   | 7         | 27         | -2.85                  | 0.0013389        |
| Mll1                   | Myeloid/lymphoid or mixed-lineage leukemia 1                                                  | 34                   | 12        | 46         | -2.83                  | 0.0000728        |
| Dnajc15                | DnaJ (Hsp40) homolog, subfamily C, member 15                                                  | 25                   | 9         | 34         | -2.77                  | 0.0008823        |
| Myo1d                  | Myosin ID                                                                                     | 38                   | 14        | 52         | -2.71                  | 0.0000276        |
| Frap1                  | FK506 binding protein 12-rapamycin associated protein 1                                       | 38                   | 14        | 52         | -2.71                  | 0.0000467        |
| Magix                  | MAGI family member, X-linked                                                                  | 38                   | 14        | 52         | -2.71                  | 0.0000467        |
| Sln5                   | Schlafen 5                                                                                    | 46                   | 17        | 63         | -2.7                   | 0.0000111        |

|                 |                                                                                                   |            |           |            |              |                  |
|-----------------|---------------------------------------------------------------------------------------------------|------------|-----------|------------|--------------|------------------|
| Tbc1d17         | TBC1 domain family, member 17                                                                     | 40         | 15        | 55         | -2.66        | 0.0000474        |
| Mm.393986       | Transcribed locus                                                                                 | 24         | 9         | 33         | -2.66        | 0.0008706        |
| Tm2d3           | TM2 domain containing 3                                                                           | 24         | 9         | 33         | -2.66        | 0.0008706        |
| Lrp5            | Low density lipoprotein receptor-related protein 5                                                | 24         | 9         | 33         | -2.66        | 0.0014572        |
| Rela            | V-rel reticuloendotheliosis viral oncogene homolog A (avian)                                      | 24         | 9         | 33         | -2.66        | 0.0014638        |
| Wdr13           | WD repeat domain 13                                                                               | 69         | 26        | 95         | -2.65        | 0.0000001        |
| Fxc1            | Fractured callus expressed transcript 1                                                           | 79         | 30        | 109        | -2.63        | 0.0000000        |
| 1110051M20Rik   | RIKEN cDNA 1110051M20 gene                                                                        | 29         | 11        | 40         | -2.63        | 0.0003244        |
| Chrna2          | Cholinergic receptor, nicotinic, alpha polypeptide 2 (neuronal)                                   | 29         | 11        | 40         | -2.63        | 0.0003244        |
| Smarca4         | SWI/SNF related, matrix associated, actin dependent regulator of chromatin, subfamily a, member 4 | 71         | 27        | 98         | -2.62        | 0.0000000        |
| Per3            | Period homolog 3 (Drosophila)                                                                     | 34         | 13        | 47         | -2.61        | 0.0001235        |
| Ampd3           | AMP deaminase 3                                                                                   | 26         | 10        | 36         | -2.6         | 0.0008891        |
| Gtl2            | GTL2, imprinted maternally expressed untranslated mRNA                                            | 36         | 14        | 50         | -2.57        | 0.0000763        |
| Usp20           | Ubiquitin specific peptidase 20                                                                   | 43         | 17        | 60         | -2.52        | 0.0000293        |
| Nrxn2           | Neurexin II                                                                                       | 70         | 28        | 98         | -2.5         | 0.0000002        |
| 2310043N10Rik   | RIKEN cDNA 2310043N10 gene                                                                        | 483        | 194       | 677        | -2.48        | 0.0000000        |
| Ubqln4          | Ubiquilin 4                                                                                       | 67         | 27        | 94         | -2.48        | 0.0000004        |
| Hrbl            | HIV-1 Rev binding protein-like                                                                    | 52         | 21        | 73         | -2.47        | 0.0000043        |
| <b>Hsd17b11</b> | <b>Hydroxysteroid (17-beta) dehydrogenase 11</b>                                                  | <b>170</b> | <b>70</b> | <b>240</b> | <b>-2.42</b> | <b>0.0000000</b> |
| Hdac7a          | Histone deacetylase 7A                                                                            | 41         | 17        | 58         | -2.41        | 0.0001195        |
| Ociad1          | OClA domain containing 1                                                                          | 172        | 72        | 244        | -2.38        | 0.0000000        |
| Ddx42           | DEAD (Asp-Glu-Ala-Asp) box polypeptide 42                                                         | 43         | 18        | 61         | -2.38        | 0.0000744        |
| <b>Scd4</b>     | <b>Stearoyl-coenzyme A desaturase 4</b>                                                           | <b>38</b>  | <b>16</b> | <b>54</b>  | <b>-2.37</b> | <b>0.0001976</b> |
| Dot1l           | DOT1-like, histone H3 methyltransferase (S. cerevisiae)                                           | 26         | 11        | 37         | -2.36        | 0.0014561        |
| Clec2d          | C-type lectin domain family 2, member d                                                           | 125        | 53        | 178        | -2.35        | 0.0000000        |
| Tpd52l1         | Tumor protein D52-like 1                                                                          | 35         | 15        | 50         | -2.33        | 0.0005020        |
| Cacna1a         | cDNA sequence BY080835                                                                            | 51         | 22        | 73         | -2.31        | 0.0000264        |
| Tnpo3           | Transportin 3                                                                                     | 44         | 19        | 63         | -2.31        | 0.0001133        |
| Gpc1            | Glypican 1                                                                                        | 120        | 52        | 172        | -2.3         | 0.0000000        |
| Lima1           | LIM domain and actin binding 1                                                                    | 30         | 13        | 43         | -2.3         | 0.0008668        |
| Yip1f           | Yip1 domain family, member 1                                                                      | 55         | 24        | 79         | -2.29        | 0.0000160        |
| Mm.417366       | Transcribed locus                                                                                 | 39         | 17        | 56         | -2.29        | 0.0003008        |
| Mm.413858       | Transcribed locus                                                                                 | 32         | 14        | 46         | -2.28        | 0.0012878        |
| Txndc5          | Thioredoxin domain containing 5                                                                   | 63         | 28        | 91         | -2.25        | 0.0000056        |
| Atic            | 5-aminoimidazole-4-carboxamide ribonucleotide formyltransferase/IMP cyclohydrolase                | 27         | 12        | 39         | -2.25        | 0.0022733        |
| Slc1a5          | Solute carrier family 1 (neutral amino acid transporter), member 5                                | 27         | 12        | 39         | -2.25        | 0.0022733        |
| <b>Hmox1</b>    | <b>Heme oxygenase (decycling) 1</b>                                                               | <b>65</b>  | <b>29</b> | <b>94</b>  | <b>-2.24</b> | <b>0.0000053</b> |
| 4732415M23Rik   | RIKEN cDNA 4732415M23 gene                                                                        | 56         | 25        | 81         | -2.24        | 0.0000237        |
| BC021381        | CDNA sequence BC021381                                                                            | 67         | 30        | 97         | -2.23        | 0.0000051        |
| <b>Ehhadh</b>   | <b>Enoyl-Coenzyme A, hydratase/3-hydroxyacyl Coenzyme A dehydrogenase</b>                         | <b>38</b>  | <b>17</b> | <b>55</b>  | <b>-2.23</b> | <b>0.0007021</b> |
| Arvcf           | Armadillo repeat gene deleted in velo-cardio-facial syndrome                                      | 69         | 31        | 100        | -2.22        | 0.0000031        |
| Usp8            | Ubiquitin specific peptidase 8                                                                    | 40         | 18        | 58         | -2.22        | 0.0002871        |
| Rasgef1b        | RasGEF domain family, member 1B                                                                   | 40         | 18        | 58         | -2.22        | 0.0004310        |
| <b>Gmpr</b>     | <b>Guanosine monophosphate reductase</b>                                                          | <b>157</b> | <b>71</b> | <b>228</b> | <b>-2.21</b> | <b>0.0000000</b> |
| Blmh            | Bleomycin hydrolase                                                                               | 42         | 19        | 61         | -2.21        | 0.0002725        |
| Pcx             | Pyruvate carboxylase                                                                              | 31         | 14        | 45         | -2.21        | 0.0013204        |
| Ehd2            | EH-domain containing 2                                                                            | 55         | 25        | 80         | -2.2         | 0.0000363        |
| Gas6            | Growth arrest specific 6                                                                          | 123        | 56        | 179        | -2.19        | 0.0000000        |
| Ctsz            | Cathepsin Z                                                                                       | 48         | 22        | 70         | -2.18        | 0.0001005        |
| Ap2a1           | Adaptor protein complex AP-2, alpha 1 subunit                                                     | 35         | 16        | 51         | -2.18        | 0.0007656        |
| 2510039O18Rik   | RIKEN cDNA 2510039O18 gene                                                                        | 39         | 18        | 57         | -2.16        | 0.0009981        |
| Fbln1           | Fibulin 1                                                                                         | 75         | 35        | 110        | -2.14        | 0.0000037        |
| A230106M15Rik   | RIKEN cDNA A230106M15 gene                                                                        | 30         | 14        | 44         | -2.14        | 0.0020582        |
| Cldn5           | Claudin 5                                                                                         | 30         | 14        | 44         | -2.14        | 0.0020582        |
| Bcat2           | Branched chain aminotransferase 2, mitochondrial                                                  | 156        | 73        | 229        | -2.13        | 0.0000000        |
| Mgll            | Monoglyceride lipase                                                                              | 404        | 190       | 594        | -2.12        | 0.0000000        |
| Jund            | Jun proto-oncogene related gene d                                                                 | 51         | 24        | 75         | -2.12        | 0.0001308        |
| Gcat            | Glycine C-acetyltransferase (2-amino-3-ketobutyrate-coenzyme A ligase)                            | 36         | 17        | 53         | -2.11        | 0.0011089        |
| Ppp1r9b         | Protein phosphatase 1, regulatory subunit 9B                                                      | 36         | 17        | 53         | -2.11        | 0.0016224        |
| A230097K15Rik   | RIKEN cDNA A230097K15 gene                                                                        | 42         | 20        | 62         | -2.1         | 0.0005931        |

|               |                                                                        |            |            |            |              |                  |
|---------------|------------------------------------------------------------------------|------------|------------|------------|--------------|------------------|
| Mark2         | MAP/microtubule affinity-regulating kinase 2                           | 40         | 19         | 59         | -2.1         | 0.0006365        |
| <b>Ivd</b>    | <b>Isovaleryl coenzyme A dehydrogenase</b>                             | <b>497</b> | <b>238</b> | <b>735</b> | <b>-2.08</b> | <b>0.0000000</b> |
| Ppargc1b      | Peroxisome proliferative activated receptor, gamma, coactivator 1 beta | 48         | 23         | 71         | -2.08        | 0.0002186        |
| Plec1         | Plectin 1                                                              | 83         | 40         | 123        | -2.07        | 0.0000027        |
| Trim44        | Tripartite motif-containing 44                                         | 58         | 28         | 86         | -2.07        | 0.0000971        |
| A630033E08Rik | RIKEN cDNA A630033E08 gene                                             | 56         | 27         | 83         | -2.07        | 0.0001050        |
| Hdac3         | Histone deacetylase 3                                                  | 39         | 19         | 58         | -2.05        | 0.0014415        |
| <b>Dcxr</b>   | <b>Dicarbonyl L-xylulose reductase</b>                                 | <b>35</b>  | <b>17</b>  | <b>52</b>  | <b>-2.05</b> | <b>0.0016846</b> |
| Tmem16k       | Transmembrane protein 16K                                              | 94         | 46         | 140        | -2.04        | 0.0000006        |
| Brap          | BRCA1 associated protein                                               | 49         | 24         | 73         | -2.04        | 0.0003043        |
| Spp13         | Signal peptide peptidase 3                                             | 43         | 21         | 64         | -2.04        | 0.0008223        |
| Gstk1         | Glutathione S-transferase kappa 1                                      | 79         | 39         | 118        | -2.02        | 0.0000063        |
| 1810037117Rik | RIKEN cDNA 1810037117 gene                                             | 412        | 206        | 618        | -2           | 0.0000000        |
| Ppm1a         | Protein phosphatase 1A, magnesium dependent, alpha isoform             | 234        | 117        | 351        | -2           | 0.0000000        |
| Synpo2l       | Synaptopodin 2-like                                                    | 138        | 69         | 207        | -2           | 0.0000000        |
| Bola1         | BolA-like 1 (E. coli)                                                  | 62         | 31         | 93         | -2           | 0.0000561        |
| Rnf126        | Ring finger protein 126                                                | 46         | 23         | 69         | -2           | 0.0010210        |
| Clock         | Circadian locomotor output cycles kaput                                | 40         | 20         | 60         | -2           | 0.0019618        |
| Rpl35         | Ribosomal protein L35                                                  | 381        | 192        | 573        | -1.98        | 0.0000000        |
| Lonp2         | Lon peptidase 2, peroxisomal                                           | 101        | 51         | 152        | -1.98        | 0.0000008        |
| Txnip         | Thioredoxin interacting protein                                        | 978        | 494        | 1472       | -1.97        | 0.0000000        |
| Pfn1          | Profilin 1                                                             | 173        | 88         | 261        | -1.96        | 0.0000000        |
| Cdc2l1        | Cell division cycle 2-like 1                                           | 55         | 28         | 83         | -1.96        | 0.0003201        |
| Pkd2          | Polycystic kidney disease 2                                            | 53         | 27         | 80         | -1.96        | 0.0004866        |
| Setx          | Senataxin                                                              | 47         | 24         | 71         | -1.95        | 0.0009320        |
| Mrpl46        | Mitochondrial ribosomal protein L46                                    | 43         | 22         | 65         | -1.95        | 0.0011668        |
| Rars          | Arginyl-tRNA synthetase                                                | 72         | 37         | 109        | -1.94        | 0.0000490        |
| <b>Bckdhb</b> | <b>Branched chain ketoacid dehydrogenase E1, beta polypeptide</b>      | <b>68</b>  | <b>35</b>  | <b>103</b> | <b>-1.94</b> | <b>0.0000810</b> |
| Mm.397227     | Transcribed locus                                                      | 118        | 61         | 179        | -1.93        | 0.0000002        |
| Smg7          | Smg-7 homolog, nonsense mediated mRNA decay factor (C. elegans)        | 62         | 32         | 94         | -1.93        | 0.0001609        |
| Ckb           | Creatine kinase, brain                                                 | 58         | 30         | 88         | -1.93        | 0.0001924        |
| Tmem182       | Transmembrane protein 182                                              | 237        | 123        | 360        | -1.92        | 0.0000000        |
| Tacc1         | Transforming, acidic coiled-coil containing protein 1                  | 79         | 41         | 120        | -1.92        | 0.0000237        |
| Phf21a        | PHD finger protein 21A                                                 | 54         | 28         | 82         | -1.92        | 0.0006385        |
| C030002C11Rik | RIKEN cDNA C030002C11 gene                                             | 88         | 46         | 134        | -1.91        | 0.0000076        |
| C330023M02Rik | RIKEN cDNA C330023M02 gene                                             | 67         | 35         | 102        | -1.91        | 0.0000848        |
| Dennd4b       | DENN/MADD domain containing 4B                                         | 65         | 34         | 99         | -1.91        | 0.0001339        |
| Stk24         | Serine/threonine kinase 24 (STE20 homolog, yeast)                      | 46         | 24         | 70         | -1.91        | 0.0019482        |
| Myot          | Myotilin                                                               | 217        | 114        | 331        | -1.9         | 0.0000000        |
| Arhgap26      | Rho GTPase activating protein 26                                       | 84         | 44         | 128        | -1.9         | 0.0000179        |
| Sh2d3c        | SH2 domain containing 3C                                               | 78         | 41         | 119        | -1.9         | 0.0000484        |
| Metap1        | Methionine aminopeptidase-like 1                                       | 59         | 31         | 90         | -1.9         | 0.0002549        |
| <b>Txnrd2</b> | <b>Thioredoxin reductase 2</b>                                         | <b>72</b>  | <b>38</b>  | <b>110</b> | <b>-1.89</b> | <b>0.0000875</b> |
| Spnb1         | Spectrin beta 1                                                        | 105        | 56         | 161        | -1.87        | 0.0000022        |
| Slc25a34      | Solute carrier family 25, member 34                                    | 244        | 131        | 375        | -1.86        | 0.0000000        |
| Cyyr1         | cysteine/tyrosine-rich 1                                               | 56         | 30         | 86         | -1.86        | 0.0004036        |
| Sp1           | Trans-acting transcription factor 1                                    | 43         | 23         | 66         | -1.86        | 0.0022599        |
| Ank3          | Ankyrin 3, epithelial                                                  | 91         | 49         | 140        | -1.85        | 0.0000123        |
| Tmem34        | Transmembrane protein 34                                               | 78         | 42         | 120        | -1.85        | 0.0000654        |
| Zrsr1         | Zinc finger (CCCH type), RNA binding motif and serine/arginine rich 1  | 65         | 35         | 100        | -1.85        | 0.0003351        |
| Rnh1          | Ribonuclease/angiogenin inhibitor 1                                    | 63         | 34         | 97         | -1.85        | 0.0003707        |
| 0610010K14Rik | RIKEN cDNA 0610010K14 gene                                             | 52         | 28         | 80         | -1.85        | 0.0012989        |
| Snrpf         | Small nuclear ribonucleoprotein polypeptide F                          | 52         | 28         | 80         | -1.85        | 0.0012989        |
| Dctn1         | Dynactin 1                                                             | 92         | 50         | 142        | -1.84        | 0.0000157        |
| <b>Acad9</b>  | <b>Acyl-Coenzyme A dehydrogenase family, member 9</b>                  | <b>81</b>  | <b>44</b>  | <b>125</b> | <b>-1.84</b> | <b>0.0000718</b> |
| Clcn7         | Chloride channel 7                                                     | 61         | 33         | 94         | -1.84        | 0.0004308        |
| Acaa1a        | Acetyl-Coenzyme A acyltransferase 1A                                   | 61         | 33         | 94         | -1.84        | 0.0005793        |
| H13           | Histocompatibility 13                                                  | 48         | 26         | 74         | -1.84        | 0.0016758        |
| Nrip1         | Nuclear receptor interacting protein 1                                 | 48         | 26         | 74         | -1.84        | 0.0022630        |
| Setd7         | SET domain containing (lysine methyltransferase) 7                     | 66         | 36         | 102        | -1.83        | 0.0004252        |

|                |                                                                                                  |            |            |             |              |                  |
|----------------|--------------------------------------------------------------------------------------------------|------------|------------|-------------|--------------|------------------|
| Atp11c         | Atpase, class VI, type 11C                                                                       | 57         | 31         | 88          | -1.83        | 0.0007103        |
| 2810410M20Rik  | RIKEN cDNA 2810410M20 gene                                                                       | 53         | 29         | 82          | -1.82        | 0.0012337        |
| Ddx28          | DEAD (Asp-Glu-Ala-Asp) box polypeptide 28                                                        | 53         | 29         | 82          | -1.82        | 0.0012337        |
| Fbxo6          | F-box protein 6                                                                                  | 51         | 28         | 79          | -1.82        | 0.0018344        |
| <b>Glud1</b>   | <b>Glutamate dehydrogenase 1</b>                                                                 | <b>169</b> | <b>93</b>  | <b>262</b>  | <b>-1.81</b> | <b>0.0000000</b> |
| Atp1b3         | ATPase, Ca <sup>++</sup> transporting, cardiac muscle, slow twitch 2                             | 78         | 43         | 121         | -1.81        | 0.0001113        |
| Mm.429877      | Transcribed locus                                                                                | 58         | 32         | 90          | -1.81        | 0.0009039        |
| <b>Aldh6a1</b> | <b>Aldehyde dehydrogenase family 6, subfamily A1</b>                                             | <b>374</b> | <b>207</b> | <b>581</b>  | <b>-1.8</b>  | <b>0.0000000</b> |
| Mboat5         | Membrane bound O-acyltransferase domain containing 5                                             | 74         | 41         | 115         | -1.8         | 0.0001435        |
| Ehbp111        | EH domain binding protein 1-like 1                                                               | 72         | 40         | 112         | -1.8         | 0.0001588        |
| Ppp5c          | Protein phosphatase 5, catalytic subunit                                                         | 63         | 35         | 98          | -1.8         | 0.0006599        |
| Tns1           | Tensin 1                                                                                         | 958        | 534        | 1492        | -1.79        | 0.0000000        |
| <b>Acox1</b>   | <b>Acyl-Coenzyme A oxidase 1, palmitoyl</b>                                                      | <b>846</b> | <b>471</b> | <b>1317</b> | <b>-1.79</b> | <b>0.0000000</b> |
| Oat            | Ornithine aminotransferase                                                                       | 167        | 93         | 260         | -1.79        | 0.0000000        |
| Tmem111        | Transmembrane protein 111                                                                        | 61         | 34         | 95          | -1.79        | 0.0007726        |
| Cuta           | CutA divalent cation tolerance homolog (E. coli)                                                 | 61         | 34         | 95          | -1.79        | 0.0010222        |
| Rcan1          | Regulator of calcineurin 1                                                                       | 73         | 41         | 114         | -1.78        | 0.0002010        |
| Acss1          | Acyl-CoA synthetase short-chain family member 1                                                  | 763        | 430        | 1193        | -1.77        | 0.0000000        |
| Tbcel          | Tubulin folding cofactor E-like                                                                  | 96         | 54         | 150         | -1.77        | 0.0000286        |
| A930001N09Rik  | RIKEN cDNA A930001N09 gene                                                                       | 62         | 35         | 97          | -1.77        | 0.0009690        |
| Ppp2r5d        | Protein phosphatase 2, regulatory subunit B (B56), delta isoform                                 | 62         | 35         | 97          | -1.77        | 0.0012709        |
| Sbf2           | SET binding factor 2                                                                             | 55         | 31         | 86          | -1.77        | 0.0019634        |
| Fbxo31         | F-box protein 31                                                                                 | 300        | 170        | 470         | -1.76        | 0.0000000        |
| Slc27a1        | Solute carrier family 27 (fatty acid transporter), member 1                                      | 249        | 141        | 390         | -1.76        | 0.0000000        |
| Vamp2          | Vesicle-associated membrane protein 2                                                            | 92         | 52         | 144         | -1.76        | 0.0000487        |
| Myo18a         | Myosin XVIIIa                                                                                    | 76         | 43         | 119         | -1.76        | 0.0002272        |
| Mpnd           | MPN domain containing                                                                            | 60         | 34         | 94          | -1.76        | 0.0014171        |
| Rps29          | Ribosomal protein L29                                                                            | 1151       | 654        | 1805        | -1.75        | 0.0000000        |
| Acot2          | Acyl-CoA thioesterase 2                                                                          | 1059       | 602        | 1661        | -1.75        | 0.0000000        |
| Adprhl1        | ADP-ribosylhydrolase like 1                                                                      | 259        | 148        | 407         | -1.75        | 0.0000000        |
| Lgals1         | Lectin, galactose binding, soluble 1                                                             | 181        | 103        | 284         | -1.75        | 0.0000000        |
| <b>Hibadh</b>  | <b>3-hydroxyisobutyrate dehydrogenase</b>                                                        | <b>177</b> | <b>101</b> | <b>278</b>  | <b>-1.75</b> | <b>0.0000000</b> |
| Psm2           | Proteasome (prosome, macropain) 26S subunit, non-ATPase, 2                                       | 126        | 72         | 198         | -1.75        | 0.0000036        |
| Ablim3         | Actin binding LIM protein family, member 3                                                       | 65         | 37         | 102         | -1.75        | 0.0010220        |
| Smtn           | Smoothelin                                                                                       | 110        | 63         | 173         | -1.74        | 0.0000162        |
| C130006E23     | Hypothetical protein C130006E23                                                                  | 87         | 50         | 137         | -1.74        | 0.0001486        |
| Ppp2r5b        | Protein phosphatase 2, regulatory subunit B (B56), beta isoform                                  | 75         | 43         | 118         | -1.74        | 0.0004096        |
| Gys1           | Glycogen synthase 1, muscle                                                                      | 137        | 79         | 216         | -1.73        | 0.0000023        |
| Tbc1d22a       | TBC1 domain family, member 22a                                                                   | 99         | 57         | 156         | -1.73        | 0.0000515        |
| Plcb1          | Phospholipase C, beta 1                                                                          | 80         | 46         | 126         | -1.73        | 0.0002962        |
| Aga            | Aspartylglucosaminidase                                                                          | 59         | 34         | 93          | -1.73        | 0.0019529        |
| Atp1a2         | ATPase, Na <sup>+</sup> /K <sup>+</sup> transporting, beta 3 polypeptide                         | 833        | 483        | 1316        | -1.72        | 0.0000000        |
| Coq10a         | Coenzyme Q10 homolog A (yeast)                                                                   | 635        | 368        | 1003        | -1.72        | 0.0000000        |
| Ash1l          | Ash1 (absent, small, or homeotic)-like (Drosophila)                                              | 62         | 36         | 98          | -1.72        | 0.0015655        |
| Bsd1           | BSD domain containing 1                                                                          | 57         | 33         | 90          | -1.72        | 0.0016683        |
| Pnpla2         | Patatin-like phospholipase domain containing 2                                                   | 1275       | 744        | 2019        | -1.71        | 0.0000000        |
| 9130213B05Rik  | RIKEN cDNA 9130213B05 gene                                                                       | 75         | 44         | 119         | -1.7         | 0.0005308        |
| Als2cr2        | Amyotrophic lateral sclerosis 2 (juvenile) chromosome region, candidate 2 (human)                | 68         | 40         | 108         | -1.7         | 0.0010634        |
| Glul           | Glutamate-ammonia ligase (glutamine synthetase)                                                  | 1144       | 676        | 1820        | -1.69        | 0.0000000        |
| Rbl2           | Retinoblastoma-like 2                                                                            | 95         | 56         | 151         | -1.69        | 0.0001432        |
| Dapk1          | Death associated protein kinase 1                                                                | 78         | 46         | 124         | -1.69        | 0.0007410        |
| Fabp4          | Fatty acid binding protein 4, adipocyte                                                          | 2366       | 1401       | 3767        | -1.68        | 0.0000000        |
| Cpeb3          | Cytoplasmic polyadenylation element binding protein 3                                            | 222        | 132        | 354         | -1.68        | 0.0000000        |
| Pank1          | Pantothenate kinase 1                                                                            | 150        | 89         | 239         | -1.68        | 0.0000021        |
| Pcyt1a         | Phosphate cytidylyltransferase 1, choline, alpha isoform                                         | 69         | 41         | 110         | -1.68        | 0.0010062        |
| Dbt            | Dihydrolipoamide branched chain transacylase E2                                                  | 287        | 171        | 458         | -1.67        | 0.0000000        |
| Mm.468129      | Transcribed locus, moderately similar to NP_112605.1 acyl-CoA thioesterase 1 [Rattus norvegicus] | 251        | 150        | 401         | -1.67        | 0.0000000        |
| Psm2           | Proteasome (prosome, macropain) 26S subunit, non-ATPase, 4                                       | 104        | 62         | 166         | -1.67        | 0.0000616        |
| C230096C10Rik  | RIKEN cDNA C230096C10 gene                                                                       | 92         | 55         | 147         | -1.67        | 0.0002273        |
| Adra1b         | Adrenergic receptor, alpha 1b                                                                    | 67         | 40         | 107         | -1.67        | 0.0014458        |

|               |                                                                       |       |      |       |       |           |
|---------------|-----------------------------------------------------------------------|-------|------|-------|-------|-----------|
| Gcdh          | Glutaryl-Coenzyme A dehydrogenase                                     | 67    | 40   | 107   | -1.67 | 0.0015288 |
| Psap          | Prosaposin                                                            | 153   | 92   | 245   | -1.66 | 0.0000036 |
| Gmnn          | Geminin                                                               | 88    | 53   | 141   | -1.66 | 0.0003604 |
| Myh6          | Myosin, heavy polypeptide 6, cardiac muscle, alpha                    | 11098 | 6701 | 17799 | -1.65 | 0.0000000 |
| Ankrd23       | Ankyrin repeat domain 23                                              | 579   | 350  | 929   | -1.65 | 0.0000000 |
| 8430408G22Rik | RIKEN cDNA 8430408G22 gene                                            | 448   | 271  | 719   | -1.65 | 0.0000000 |
| Msrb3         | Methionine sulfoxide reductase B3                                     | 248   | 151  | 399   | -1.64 | 0.0000000 |
| Eif3s10       | Eukaryotic translation initiation factor 3, subunit 10 (theta)        | 155   | 94   | 249   | -1.64 | 0.0000030 |
| Slc35e1       | Solute carrier family 35, member E1                                   | 84    | 51   | 135   | -1.64 | 0.0006028 |
| Klf15         | Kruppel-like factor 15                                                | 82    | 50   | 132   | -1.64 | 0.0007126 |
| Wipi2         | WD repeat domain, phosphoinositide interacting 2                      | 74    | 45   | 119   | -1.64 | 0.0011789 |
| Nnt           | Nicotinamide nucleotide transhydrogenase                              | 822   | 503  | 1325  | -1.63 | 0.0000000 |
| Cdh5          | Cadherin 5                                                            | 380   | 233  | 613   | -1.63 | 0.0000000 |
| Aldh4a1       | Aldehyde dehydrogenase 4 family, member A1                            | 180   | 110  | 290   | -1.63 | 0.0000008 |
| Popdc2        | Popeye domain containing 2                                            | 180   | 110  | 290   | -1.63 | 0.0000008 |
| Ece1          | Endothelin converting enzyme 1                                        | 163   | 100  | 263   | -1.63 | 0.0000037 |
| Chd4          | Chromodomain helicase DNA binding protein 4                           | 124   | 76   | 200   | -1.63 | 0.0000562 |
| Zfp771        | Zinc finger protein 771                                               | 93    | 57   | 150   | -1.63 | 0.0004350 |
| Gsk3b         | Glycogen synthase kinase-3 beta                                       | 75    | 46   | 121   | -1.63 | 0.0017763 |
| Dynl2         | Dynein light chain LC8-type 2                                         | 306   | 188  | 494   | -1.62 | 0.0000000 |
| Scamp2        | Secretory carrier membrane protein 2                                  | 117   | 72   | 189   | -1.62 | 0.0000697 |
| Elf2          | E74-like factor 2                                                     | 88    | 54   | 142   | -1.62 | 0.0007626 |
| Higd1a        | HIG1 domain family, member 1A                                         | 321   | 200  | 521   | -1.6  | 0.0000000 |
| Zbtb16        | Zinc finger and BTB domain containing 16                              | 133   | 83   | 216   | -1.6  | 0.0000475 |
| Hspa1b        | Heat shock 70kDa protein 1B                                           | 119   | 74   | 193   | -1.6  | 0.0000975 |
| Abhd1         | Abhydrolase domain containing 1                                       | 114   | 71   | 185   | -1.6  | 0.0001688 |
| Smcr7         | Smith-Magenis syndrome chromosome region, candidate 7 homolog (human) | 96    | 60   | 156   | -1.6  | 0.0004358 |
| Grb10         | Growth factor receptor bound protein 10                               | 88    | 55   | 143   | -1.6  | 0.0009000 |
| Ogdh          | Oxoglutarate dehydrogenase (lipoamide)                                | 643   | 402  | 1045  | -1.59 | 0.0000000 |
| Atp1a1        | ATPase, Na+/K+ transporting, alpha 1 polypeptide                      | 495   | 310  | 805   | -1.59 | 0.0000000 |
| Tenc1         | Tensin like C1 domain-containing phosphatase                          | 430   | 270  | 700   | -1.59 | 0.0000000 |
| Lrrc2         | Leucine rich repeat containing 2                                      | 323   | 202  | 525   | -1.59 | 0.0000000 |
| Bicd2         | Bicaudal D homolog 2 (Drosophila)                                     | 166   | 104  | 270   | -1.59 | 0.0000056 |
| Rxra          | Retinoid X receptor alpha                                             | 163   | 102  | 265   | -1.59 | 0.0000086 |
| Calcoco1      | Calcium binding and coiled coil domain 1                              | 147   | 92   | 239   | -1.59 | 0.0000244 |
| Hagh          | Hydroxyacyl glutathione hydrolase                                     | 121   | 76   | 197   | -1.59 | 0.0001343 |
| Ddx17         | DEAD (Asp-Glu-Ala-Asp) box polypeptide 17                             | 94    | 59   | 153   | -1.59 | 0.0004873 |
| 4931406P16Rik | RIKEN cDNA 4931406P16 gene                                            | 97    | 61   | 158   | -1.59 | 0.0005138 |
| Alkbh7        | AlkB, alkylation repair homolog 7 (E. coli)                           | 83    | 52   | 135   | -1.59 | 0.0013353 |
| Ntn1          | Netrin 1                                                              | 352   | 222  | 574   | -1.58 | 0.0000000 |
| Mrpl33        | Mitochondrial ribosomal protein L33                                   | 257   | 162  | 419   | -1.58 | 0.0000000 |
| Nckap1        | NCK-associated protein 1                                              | 79    | 50   | 129   | -1.58 | 0.0020834 |
| Aebp2         | AE binding protein 2                                                  | 104   | 66   | 170   | -1.57 | 0.0006201 |
| Arhgap21      | Rho GTPase activating protein 21                                      | 96    | 61   | 157   | -1.57 | 0.0006745 |
| Pex16         | Peroxisome biogenesis factor 16                                       | 85    | 54   | 139   | -1.57 | 0.0014015 |
| Oxct1         | 3-oxoacid CoA transferase 1                                           | 2083  | 1332 | 3415  | -1.56 | 0.0000000 |
| 2310016E02Rik | RIKEN cDNA 2310016E02 gene                                            | 214   | 137  | 351   | -1.56 | 0.0000009 |
| Ltbp4         | Latent transforming growth factor beta binding protein 4              | 135   | 86   | 221   | -1.56 | 0.0000798 |
| Lamb2         | Laminin, beta 2                                                       | 100   | 64   | 164   | -1.56 | 0.0006301 |
| Xpr1          | Xenotropic and polytropic retrovirus receptor 1                       | 83    | 53   | 136   | -1.56 | 0.0020553 |
| Tnnc1         | Troponin C, cardiac/slow skeletal                                     | 3209  | 2068 | 5277  | -1.55 | 0.0000000 |
| Dnaja3        | DnaJ (Hsp40) homolog, subfamily A, member 3                           | 115   | 74   | 189   | -1.55 | 0.0003487 |
| Myh14         | Myosin, heavy polypeptide 14                                          | 95    | 61   | 156   | -1.55 | 0.0008819 |
| H2-Ke6        | H2-K region expressed gene 6                                          | 95    | 61   | 156   | -1.55 | 0.0010857 |
| S3-12         | Plasma membrane associated protein, S3-12                             | 404   | 261  | 665   | -1.54 | 0.0000000 |
| Rabac1        | Rab acceptor 1 (prenylated)                                           | 335   | 217  | 552   | -1.54 | 0.0000000 |
| Atp6v1f       | ATPase, H+ transporting, lysosomal V1 subunit F                       | 105   | 68   | 173   | -1.54 | 0.0006800 |
| Mm.403851     | Transcribed locus                                                     | 99    | 64   | 163   | -1.54 | 0.0010057 |
| Dyrk1a        | Dynein light chain Tctex-type 1                                       | 94    | 61   | 155   | -1.54 | 0.0014896 |
| Cnksr3        | Cnksr family member 3                                                 | 85    | 55   | 140   | -1.54 | 0.0021358 |



|                    |                                                                                                                                       |       |      |       |       |           |
|--------------------|---------------------------------------------------------------------------------------------------------------------------------------|-------|------|-------|-------|-----------|
| Tsc2               | Tuberous sclerosis 2                                                                                                                  | 143   | 93   | 236   | -1.53 | 0.0000842 |
| Rbpms              | RNA binding protein with multiple splicing                                                                                            | 358   | 235  | 593   | -1.52 | 0.0000000 |
| Hsp110             | Heat shock protein 110                                                                                                                | 140   | 92   | 232   | -1.52 | 0.0001870 |
| Ppm1k              | Protein phosphatase 1K (PP2C domain containing)                                                                                       | 104   | 68   | 172   | -1.52 | 0.0011305 |
| Psme3              | Proteasome (prosome, macropain) 28 subunit, 3                                                                                         | 99    | 65   | 164   | -1.52 | 0.0014946 |
| Pmpcb              | Peptidase (mitochondrial processing) beta                                                                                             | 102   | 67   | 169   | -1.52 | 0.0015326 |
| Mafk               | V-maf musculoaponeurotic fibrosarcoma oncogene family, protein K (avian)                                                              | 90    | 59   | 149   | -1.52 | 0.0022781 |
| Lpl                | Lipoprotein lipase                                                                                                                    | 12696 | 8379 | 21075 | -1.51 | 0.0000000 |
| Hist1h1c           | Histone cluster 1, H1c                                                                                                                | 212   | 140  | 352   | -1.51 | 0.0000038 |
| Trak1              | Trafficking protein, kinesin binding 1                                                                                                | 174   | 115  | 289   | -1.51 | 0.0000447 |
| Speg               | SPEG complex locus                                                                                                                    | 91    | 60   | 151   | -1.51 | 0.0021534 |
| Galnt1             | UDP-N-acetyl-alpha-D-galactosamine:polypeptide N-acetylgalactosaminyltransferase 1                                                    | 94    | 62   | 156   | -1.51 | 0.0022123 |
| OTTMUSG00000008561 | Predicted gene, OTTMUSG00000008561                                                                                                    | 184   | 122  | 306   | -1.5  | 0.0000234 |
| Obscn              | Obscurin, cytoskeletal calmodulin and titin-interacting RhoGEF                                                                        | 955   | 640  | 1595  | -1.49 | 0.0000000 |
| Nploc4             | Nuclear protein localization 4 homolog (S. cerevisiae)                                                                                | 109   | 73   | 182   | -1.49 | 0.0014307 |
| Nrap               | Nebulin-related anchoring protein                                                                                                     | 666   | 447  | 1113  | -1.48 | 0.0000000 |
| Eif2s2             | Eukaryotic translation initiation factor 2, subunit 2 (beta)                                                                          | 287   | 193  | 480   | -1.48 | 0.0000003 |
| Ankrd17            | Ankyrin repeat domain 17                                                                                                              | 221   | 149  | 370   | -1.48 | 0.0000078 |
| Pccb               | Propionyl Coenzyme A carboxylase, beta polypeptide                                                                                    | 212   | 143  | 355   | -1.48 | 0.0000111 |
| Adhfe1             | Alcohol dehydrogenase, iron containing, 1                                                                                             | 183   | 123  | 306   | -1.48 | 0.0000507 |
| Cpt1a              | Carnitine palmitoyltransferase 1a, liver                                                                                              | 174   | 117  | 291   | -1.48 | 0.0000508 |
| Ola1               | Obg-like ATPase 1                                                                                                                     | 153   | 103  | 256   | -1.48 | 0.0001636 |
| Finc               | Filamin C, gamma (actin binding protein 280)                                                                                          | 154   | 104  | 258   | -1.48 | 0.0001854 |
| Tfdp2              | Transcription factor Dp 2                                                                                                             | 131   | 88   | 219   | -1.48 | 0.0004682 |
| Tom1l2             | Target of myb1-like 2 (chicken)                                                                                                       | 135   | 91   | 226   | -1.48 | 0.0005393 |
| Ubr5               | Ubiquitin protein ligase E3 component n-recognin 5                                                                                    | 104   | 70   | 174   | -1.48 | 0.0015671 |
| Hes1               | Hairy and enhancer of split 1 (Drosophila)                                                                                            | 107   | 72   | 179   | -1.48 | 0.0015982 |
| Itga7              | Integrin alpha 7                                                                                                                      | 111   | 75   | 186   | -1.48 | 0.0017439 |
| Hadha              | Hydroxyacyl-Coenzyme A dehydrogenase/3-ketoacyl-Coenzyme A thiolase/enoyl-Coenzyme A hydratase (trifunctional protein), alpha subunit | 1667  | 1127 | 2794  | -1.47 | 0.0000000 |
| Malat1             | Metastasis associated lung adenocarcinoma transcript 1 (non-coding RNA)                                                               | 710   | 481  | 1191  | -1.47 | 0.0000000 |
| Bckdha             | Branched chain ketoacid dehydrogenase E1, alpha polypeptide                                                                           | 701   | 475  | 1176  | -1.47 | 0.0000000 |
| Lmo7               | LIM domain only 7                                                                                                                     | 378   | 256  | 634   | -1.47 | 0.0000000 |
| Canx               | Calnexin                                                                                                                              | 355   | 241  | 596   | -1.47 | 0.0000000 |
| Tax1bp1            | Tax1 (human T-cell leukemia virus type I) binding protein 1                                                                           | 305   | 207  | 512   | -1.47 | 0.0000002 |
| AI314180           | Expressed sequence AI314180                                                                                                           | 284   | 192  | 476   | -1.47 | 0.0000006 |
| Hhntl              | Hedgehog acyltransferase-like                                                                                                         | 228   | 155  | 383   | -1.47 | 0.0000102 |
| Enah               | Enabled homolog (Drosophila)                                                                                                          | 201   | 136  | 337   | -1.47 | 0.0000222 |
| Ttc7b              | Tetratricopeptide repeat domain 7B                                                                                                    | 176   | 119  | 295   | -1.47 | 0.0000652 |
| Smad4              | MAD homolog 4 (Drosophila)                                                                                                            | 159   | 108  | 267   | -1.47 | 0.0001601 |
| Mgea5              | Meningioma expressed antigen 5 (hyaluronidase)                                                                                        | 159   | 108  | 267   | -1.47 | 0.0001908 |
| Tnrc6a             | Trinucleotide repeat containing 6A                                                                                                    | 147   | 100  | 247   | -1.47 | 0.0003593 |
| Slc6a6             | Solute carrier family 6 (neurotransmitter transporter, taurine), member 6                                                             | 140   | 95   | 235   | -1.47 | 0.0004647 |
| AI467657           | Expressed sequence AI467657                                                                                                           | 139   | 94   | 233   | -1.47 | 0.0004906 |
| Lypla2             | Lysophospholipase 2                                                                                                                   | 106   | 72   | 178   | -1.47 | 0.0020277 |
| Ankrd1             | Ankyrin repeat domain 1 (cardiac muscle)                                                                                              | 4962  | 3379 | 8341  | -1.46 | 0.0000000 |
| Acadvl             | Acyl-Coenzyme A dehydrogenase, very long chain                                                                                        | 867   | 593  | 1460  | -1.46 | 0.0000000 |
| Ablim1             | Actin-binding LIM protein 1                                                                                                           | 411   | 281  | 692   | -1.46 | 0.0000000 |
| Slc43a3            | Solute carrier family 4 (anion exchanger), member 3                                                                                   | 211   | 144  | 355   | -1.46 | 0.0000246 |
| Timp4              | Tissue inhibitor of metalloproteinase 4                                                                                               | 182   | 124  | 306   | -1.46 | 0.0000756 |
| Lym5               | LYR motif containing 5                                                                                                                | 126   | 86   | 212   | -1.46 | 0.0011674 |
| Pnpla7             | Patatin-like phospholipase domain containing 7                                                                                        | 119   | 81   | 200   | -1.46 | 0.0015163 |
| Hrc                | Histidine rich calcium binding protein                                                                                                | 463   | 318  | 781   | -1.45 | 0.0000000 |
| Luc7l2             | LUC7-like 2 (S. cerevisiae)                                                                                                           | 248   | 170  | 418   | -1.45 | 0.0000056 |
| Sar1a              | SAR1 gene homolog A (S. cerevisiae)                                                                                                   | 188   | 129  | 317   | -1.45 | 0.0000732 |
| 1700081L11Rik      | RIKEN cDNA 1700081L11 gene                                                                                                            | 156   | 107  | 263   | -1.45 | 0.0003331 |
| Timm17a            | Translocase of inner mitochondrial membrane 17a                                                                                       | 153   | 105  | 258   | -1.45 | 0.0003910 |
| Pitrm1             | Pitriylsin metallepetidase 1                                                                                                          | 148   | 102  | 250   | -1.45 | 0.0004551 |
| Zfp664             | Zinc finger protein 664                                                                                                               | 119   | 82   | 201   | -1.45 | 0.0021353 |
| Ech1               | Enoyl coenzyme A hydratase 1, peroxisomal                                                                                             | 2289  | 1583 | 3872  | -1.44 | 0.0000000 |

|               |                                                                                                |             |            |             |              |                  |
|---------------|------------------------------------------------------------------------------------------------|-------------|------------|-------------|--------------|------------------|
| Clint1        | Clathrin interactor 1                                                                          | 239         | 165        | 404         | -1.44        | 0.0000095        |
| Limch1        | LIM and calponin homology domains 1                                                            | 197         | 136        | 333         | -1.44        | 0.0000675        |
| Snw1          | SNW domain containing 1                                                                        | 139         | 96         | 235         | -1.44        | 0.0008208        |
| Tra2a         | Transformer 2 alpha homolog (Drosophila)                                                       | 130         | 90         | 220         | -1.44        | 0.0012528        |
| Ube3b         | Ubiquitin protein ligase E3B                                                                   | 123         | 85         | 208         | -1.44        | 0.0019273        |
| S100a1        | S100 calcium binding protein A1                                                                | 1268        | 885        | 2153        | -1.43        | 0.0000000        |
| Son           | Son cell proliferation protein                                                                 | 378         | 264        | 642         | -1.43        | 0.0000001        |
| 2310061104Rik | RIKEN cDNA 2310061104 gene                                                                     | 308         | 215        | 523         | -1.43        | 0.0000013        |
| Tcea3         | Transcription elongation factor A (SII), 3                                                     | 256         | 178        | 434         | -1.43        | 0.0000076        |
| Nrp1          | Neuropilin 1                                                                                   | 206         | 144        | 350         | -1.43        | 0.0001048        |
| Sparcl1       | SPARC-like 1 (mast9, hevin)                                                                    | 634         | 445        | 1079        | -1.42        | 0.0000000        |
| Vegfb         | Vascular endothelial growth factor B                                                           | 497         | 348        | 845         | -1.42        | 0.0000000        |
| Vldlr         | Very low density lipoprotein receptor                                                          | 451         | 317        | 768         | -1.42        | 0.0000000        |
| Atp6v0c       | ATPase, H+ transporting, lysosomal V0 subunit C                                                | 308         | 216        | 524         | -1.42        | 0.0000018        |
| Rpl11         | Ribosomal protein L11                                                                          | 231         | 162        | 393         | -1.42        | 0.0000416        |
| Zmynd11       | Zinc finger, MYND domain containing 11                                                         | 168         | 118        | 286         | -1.42        | 0.0004964        |
| Slc2a4        | Solute carrier family 2 (facilitated glucose transporter), member 4                            | 147         | 103        | 250         | -1.42        | 0.0007902        |
| Emp2          | Epithelial membrane protein 2                                                                  | 140         | 98         | 238         | -1.42        | 0.0012733        |
| Pgcp          | Plasma glutamate carboxypeptidase                                                              | 131         | 92         | 223         | -1.42        | 0.0018436        |
| Atp5g1        | ATP synthase, H+ transporting, mitochondrial F0 complex, subunit c (subunit 9), isoform 1      | 4078        | 2887       | 6965        | -1.41        | 0.0000000        |
| Ctsd          | Cathepsin D                                                                                    | 1797        | 1269       | 3066        | -1.41        | 0.0000000        |
| Mybpc3        | Myosin binding protein C, cardiac                                                              | 1161        | 823        | 1984        | -1.41        | 0.0000000        |
| D4Wsu53e      | DNA segment, Chr 4, Wayne State University 53, expressed                                       | 425         | 300        | 725         | -1.41        | 0.0000000        |
| Flii          | Flightless I homolog (Drosophila)                                                              | 139         | 98         | 237         | -1.41        | 0.0013426        |
| Saps1         | SAPS domain family, member 1                                                                   | 132         | 93         | 225         | -1.41        | 0.0020509        |
| <b>Sesn1</b>  | <b>Sestrin 1</b>                                                                               | <b>388</b>  | <b>276</b> | <b>664</b>  | <b>-1.4</b>  | <b>0.0000003</b> |
| Acacb         | Acetyl-Coenzyme A carboxylase beta                                                             | 287         | 205        | 492         | -1.4         | 0.0000098        |
| Phb2          | Prohibitin 2                                                                                   | 236         | 168        | 404         | -1.4         | 0.0000562        |
| Mrps12        | Mitochondrial ribosomal protein S12                                                            | 220         | 157        | 377         | -1.4         | 0.0001271        |
| Ewsr1         | Ewing sarcoma breakpoint region 1                                                              | 194         | 138        | 332         | -1.4         | 0.0002515        |
| 9430029L20Rik | RIKEN cDNA A630084N20 gene                                                                     | 185         | 132        | 317         | -1.4         | 0.0004420        |
| Mm.415917     | Transcribed locus                                                                              | 175         | 125        | 300         | -1.4         | 0.0005757        |
| 2310003F16Rik | RIKEN cDNA 2310003F16 gene                                                                     | 160         | 114        | 274         | -1.4         | 0.0009254        |
| Herpud1       | Homocysteine-inducible, endoplasmic reticulum stress-inducible, ubiquitin-like domain member 1 | 1069        | 764        | 1833        | -1.39        | 0.0000000        |
| <b>Cyb5</b>   | <b>Cytochrome b-5</b>                                                                          | <b>1010</b> | <b>725</b> | <b>1735</b> | <b>-1.39</b> | <b>0.0000000</b> |
| Igfbp7        | Insulin-like growth factor binding protein 7                                                   | 581         | 416        | 997         | -1.39        | 0.0000000        |
| Hnrnp1        | Heterogeneous nuclear ribonucleoprotein L                                                      | 295         | 211        | 506         | -1.39        | 0.0000097        |
| Sult1a1       | Sulfotransferase family 1A, phenol-preferring, member 1                                        | 279         | 200        | 479         | -1.39        | 0.0000188        |
| Mrpl44        | Mitochondrial ribosomal protein L44                                                            | 235         | 168        | 403         | -1.39        | 0.0000796        |
| Ube2s         | Ubiquitin-conjugating enzyme E2S                                                               | 192         | 138        | 330         | -1.39        | 0.0003758        |
| Msn           | Moesin                                                                                         | 177         | 127        | 304         | -1.39        | 0.0007001        |
| Ndg2          | Nur77 downstream gene 2                                                                        | 2959        | 2143       | 5102        | -1.38        | 0.0000000        |
| Golga4        | Golgi autoantigen, golgin subfamily a, 4                                                       | 581         | 419        | 1000        | -1.38        | 0.0000000        |
| Selenbp1      | Selenium binding protein 1                                                                     | 276         | 200        | 476         | -1.38        | 0.0000335        |
| Cugbp2        | CUG triplet repeat, RNA binding protein 2                                                      | 265         | 191        | 456         | -1.38        | 0.0000362        |
| Taok1         | TAO kinase 1                                                                                   | 191         | 138        | 329         | -1.38        | 0.0005294        |
| Tmtc1         | Transmembrane and tetratricopeptide repeat containing 1                                        | 143         | 103        | 246         | -1.38        | 0.0022426        |
| Art1          | ADP-ribosyltransferase 1                                                                       | 332         | 241        | 573         | -1.37        | 0.0000070        |
| Glg1          | Golgi apparatus protein 1                                                                      | 283         | 206        | 489         | -1.37        | 0.0000344        |
| Smpd1         | Sphingomyelin phosphodiesterase 1, acid lysosomal                                              | 222         | 161        | 383         | -1.37        | 0.0001952        |
| Plaa          | Phospholipase A2, activating protein                                                           | 233         | 170        | 403         | -1.37        | 0.0002065        |
| Rdx           | Radixin                                                                                        | 196         | 143        | 339         | -1.37        | 0.0008328        |
| Nek7          | NIMA (never in mitosis gene a)-related expressed kinase 7                                      | 183         | 133        | 316         | -1.37        | 0.0008759        |
| Serpine1      | Serine (or cysteine) peptidase inhibitor, clade E, member 1                                    | 169         | 123        | 292         | -1.37        | 0.0012792        |
| C130038G02Rik | RIKEN cDNA C130038G02 gene                                                                     | 171         | 124        | 295         | -1.37        | 0.0013337        |
| Fus           | Fusion, derived from t(12;16) malignant liposarcoma (human)                                    | 155         | 113        | 268         | -1.37        | 0.0022733        |
| Rps9          | Ribosomal protein S9                                                                           | 1101        | 806        | 1907        | -1.36        | 0.0000000        |
| <b>Echs1</b>  | <b>Enoyl Coenzyme A hydratase, short chain, 1, mitochondrial</b>                               | <b>282</b>  | <b>206</b> | <b>488</b>  | <b>-1.36</b> | <b>0.0000414</b> |
| Arpc2         | Actin related protein 2/3 complex, subunit 2                                                   | 260         | 190        | 450         | -1.36        | 0.0001177        |
| Maea          | Macrophage erythroblast attacher                                                               | 237         | 173        | 410         | -1.36        | 0.0002231        |

|               |                                                                                                                                   |             |            |             |              |                  |
|---------------|-----------------------------------------------------------------------------------------------------------------------------------|-------------|------------|-------------|--------------|------------------|
| D830007F02Rik | RIKEN cDNA D830007F02 gene                                                                                                        | 236         | 173        | 409         | -1.36        | 0.0002343        |
| Fxr2          | Fragile X mental retardation, autosomal homolog 2                                                                                 | 177         | 130        | 307         | -1.36        | 0.0014300        |
| Nfia          | Nuclear factor I/A                                                                                                                | 172         | 126        | 298         | -1.36        | 0.0016792        |
| Nfic          | Nuclear factor I/C (CCAAT-binding transcription factor)                                                                           | 169         | 124        | 293         | -1.36        | 0.0019501        |
| Vim           | Vimentin                                                                                                                          | 165         | 121        | 286         | -1.36        | 0.0021799        |
| Sorbs1        | Sorbin and SH3 domain containing 1                                                                                                | 2384        | 1760       | 4144        | -1.35        | 0.0000000        |
| <b>Idh3b</b>  | <b>Isocitrate dehydrogenase 3 (NAD+) beta</b>                                                                                     | <b>1143</b> | <b>846</b> | <b>1989</b> | <b>-1.35</b> | <b>0.0000000</b> |
| Nfib          | Nuclear factor I/B                                                                                                                | 501         | 370        | 871         | -1.35        | 0.0000002        |
| Tmem38a       | Transmembrane protein 38A                                                                                                         | 373         | 276        | 649         | -1.35        | 0.0000073        |
| Hint1         | Histidine triad nucleotide binding protein 1                                                                                      | 316         | 233        | 549         | -1.35        | 0.0000300        |
| Eif4h         | Eukaryotic translation initiation factor 4H                                                                                       | 311         | 230        | 541         | -1.35        | 0.0000454        |
| Capzb         | Capping protein (actin filament) muscle Z-line, beta                                                                              | 247         | 182        | 429         | -1.35        | 0.0002131        |
| Pdk4          | Pyruvate dehydrogenase kinase, isoenzyme 4                                                                                        | 5085        | 3791       | 8876        | -1.34        | 0.0000000        |
| Gsto1         | Glutathione S-transferase omega 1                                                                                                 | 736         | 549        | 1285        | -1.34        | 0.0000000        |
| Dag1          | Dystroglycan 1                                                                                                                    | 420         | 313        | 733         | -1.34        | 0.0000037        |
| D930001I22Rik | RIKEN cDNA D930001I22 gene                                                                                                        | 303         | 226        | 529         | -1.34        | 0.0000695        |
| Kcnk3         | Potassium channel, subfamily K, member 3                                                                                          | 302         | 225        | 527         | -1.34        | 0.0000764        |
| Snx3          | Sorting nexin 3                                                                                                                   | 272         | 202        | 474         | -1.34        | 0.0001440        |
| <b>Phyhd1</b> | <b>Phytanoyl-CoA dioxygenase domain containing 1</b>                                                                              | <b>235</b>  | <b>175</b> | <b>410</b>  | <b>-1.34</b> | <b>0.0004187</b> |
| Psmc7         | Proteasome (prosome, macropain) 26S subunit, non-ATPase, 7                                                                        | 221         | 164        | 385         | -1.34        | 0.0006415        |
| Slc4a3        | Solute carrier family 4, anion exchanger, member 3                                                                                | 224         | 167        | 391         | -1.34        | 0.0006860        |
| Zcrb1         | Zinc finger CCHC-type and RNA binding motif 1                                                                                     | 179         | 133        | 312         | -1.34        | 0.0018543        |
| Cpt1b         | Carnitine palmitoyltransferase 1b, muscle                                                                                         | 762         | 569        | 1331        | -1.33        | 0.0000000        |
| <b>Egln1</b>  | <b>EGL nine homolog 1 (C. elegans)</b>                                                                                            | <b>593</b>  | <b>443</b> | <b>1036</b> | <b>-1.33</b> | <b>0.0000000</b> |
| Xirp2         | Xin actin-binding repeat containing 2                                                                                             | 361         | 271        | 632         | -1.33        | 0.0000244        |
| <b>Acads</b>  | <b>Acyl-Coenzyme A dehydrogenase, short chain</b>                                                                                 | <b>190</b>  | <b>142</b> | <b>332</b>  | <b>-1.33</b> | <b>0.0019003</b> |
| Ahnak         | AHNAK nucleoprotein (desmoyokin)                                                                                                  | 786         | 592        | 1378        | -1.32        | 0.0000000        |
| Mm.401817     | Transcribed locus                                                                                                                 | 549         | 414        | 963         | -1.32        | 0.0000003        |
| Me1           | Malic enzyme 1, NADP(+)-dependent, cytosolic                                                                                      | 497         | 376        | 873         | -1.32        | 0.0000015        |
| Sgcg          | Sarcoglycan, gamma (dystrophin-associated glycoprotein)                                                                           | 463         | 350        | 813         | -1.32        | 0.0000031        |
| Pnpla8        | Patatin-like phospholipase domain containing 8                                                                                    | 247         | 187        | 434         | -1.32        | 0.0007579        |
| Bloc1s1       | Biogenesis of lysosome-related organelles complex-1, subunit 1                                                                    | 211         | 159        | 370         | -1.32        | 0.0016625        |
| Crry          | Complement receptor related protein                                                                                               | 204         | 154        | 358         | -1.32        | 0.0018923        |
| Wnk1          | WNK lysine deficient protein kinase 1                                                                                             | 200         | 151        | 351         | -1.32        | 0.0021167        |
| Tnnt2         | Troponin T2, cardiac                                                                                                              | 5751        | 4381       | 10132       | -1.31        | 0.0000000        |
| Cpt2          | Carnitine palmitoyltransferase 2                                                                                                  | 434         | 331        | 765         | -1.31        | 0.0000117        |
| Clip4         | CAP-GLY domain containing linker protein family, member 4                                                                         | 385         | 293        | 678         | -1.31        | 0.0000308        |
| <b>Auh</b>    | <b>AU RNA binding protein/enoyl-coenzyme A hydratase</b>                                                                          | <b>270</b>  | <b>205</b> | <b>475</b>  | <b>-1.31</b> | <b>0.0004488</b> |
| Ttn           | Tubulin tyrosine ligase-like 1                                                                                                    | 3876        | 2967       | 6843        | -1.3         | 0.0000000        |
| <b>Peci</b>   | <b>Peroxisomal delta3, delta2-enoyl-Coenzyme A isomerase</b>                                                                      | <b>711</b>  | <b>545</b> | <b>1256</b> | <b>-1.3</b>  | <b>0.0000000</b> |
| Txlnb         | Taxilin beta                                                                                                                      | 714         | 548        | 1262        | -1.3         | 0.0000001        |
| Mm.415233     | Adult male aorta and vein cDNA, RIKEN full-length enriched library, clone:A530001O10 product:unclassifiable, full insert sequence | 319         | 244        | 563         | -1.3         | 0.0001796        |
| Tcf4          | Transcription factor 4                                                                                                            | 309         | 236        | 545         | -1.3         | 0.0002177        |
| Aadacl1       | Arylacetamide deacetylase-like 1                                                                                                  | 246         | 188        | 434         | -1.3         | 0.0010075        |
| Ubr2          | Ubiquitin protein ligase E3 component n-recogin 2                                                                                 | 241         | 184        | 425         | -1.3         | 0.0010467        |
| Psmc3         | Proteasome (prosome, macropain) 26S subunit, non-ATPase, 3                                                                        | 238         | 182        | 420         | -1.3         | 0.0012014        |
| Cd36          | CD36 antigen                                                                                                                      | 2910        | 2242       | 5152        | -1.29        | 0.0000000        |
| Spnb2         | spectrin beta 2                                                                                                                   | 625         | 482        | 1107        | -1.29        | 0.0000005        |
| Serpinb6b     | Serine (or cysteine) peptidase inhibitor, clade B, member 6b                                                                      | 417         | 321        | 738         | -1.29        | 0.0000316        |
| Sfrs2         | Splicing factor, arginine/serine-rich 2 (SC-35)                                                                                   | 391         | 301        | 692         | -1.29        | 0.0000563        |
| Mtus1         | Mitochondrial tumor suppressor 1                                                                                                  | 360         | 279        | 639         | -1.29        | 0.0002026        |
| Klf9          | Kruppel-like factor 9                                                                                                             | 271         | 209        | 480         | -1.29        | 0.0010800        |
| Rnaset2a      | Ribonuclease T2A                                                                                                                  | 248         | 191        | 439         | -1.29        | 0.0016379        |
| Clu           | Clusterin                                                                                                                         | 713         | 555        | 1268        | -1.28        | 0.0000002        |
| Trim54        | Tripartite motif-containing 54                                                                                                    | 582         | 453        | 1035        | -1.28        | 0.0000027        |
| Rab14         | RAB14, member RAS oncogene family                                                                                                 | 404         | 315        | 719         | -1.28        | 0.0001037        |
| Ppif          | Peptidylprolyl isomerase F (cyclophilin F)                                                                                        | 335         | 261        | 596         | -1.28        | 0.0004311        |
| D10Wsu52e     | DNA segment, Chr 10, Wayne State University 52, expressed                                                                         | 313         | 243        | 556         | -1.28        | 0.0004318        |
| Fkbp4         | FK506 binding protein 4                                                                                                           | 258         | 201        | 459         | -1.28        | 0.0020852        |

|                      |                                                                                                                                                                                    |              |             |              |              |                  |
|----------------------|------------------------------------------------------------------------------------------------------------------------------------------------------------------------------------|--------------|-------------|--------------|--------------|------------------|
| Tacc2                | Transforming, acidic coiled-coil containing protein 2                                                                                                                              | 1975         | 1549        | 3524         | -1.27        | 0.0000000        |
| Ehd4                 | EH-domain containing 4                                                                                                                                                             | 1030         | 806         | 1836         | -1.27        | 0.0000000        |
| Myom1                | Myomesin 1                                                                                                                                                                         | 1013         | 794         | 1807         | -1.27        | 0.0000000        |
| Hdlbp                | High density lipoprotein (HDL) binding protein                                                                                                                                     | 668          | 522         | 1190         | -1.27        | 0.0000007        |
| BC005537             | CDNA sequence BC005537                                                                                                                                                             | 435          | 342         | 777          | -1.27        | 0.0000973        |
| Plekhc1              | Pleckstrin homology domain containing, family C (with FERM domain) member 1                                                                                                        | 394          | 309         | 703          | -1.27        | 0.0001721        |
| Slc25a39             | Solute carrier family 25, member 39                                                                                                                                                | 324          | 257         | 581          | -1.26        | 0.0010810        |
| <b>Ndufv1</b>        | <b>NADH dehydrogenase (ubiquinone) flavoprotein 1</b>                                                                                                                              | <b>1062</b>  | <b>847</b>  | <b>1909</b>  | <b>-1.25</b> | <b>0.0000000</b> |
| Ces3                 | Carboxylesterase 3                                                                                                                                                                 | 354          | 281         | 635          | -1.25        | 0.0007619        |
| Des                  | Desmin                                                                                                                                                                             | 3843         | 3093        | 6936         | -1.24        | 0.0000000        |
| <b>Ndufv2</b>        | <b>NADH dehydrogenase (ubiquinone) flavoprotein 2</b>                                                                                                                              | <b>787</b>   | <b>632</b>  | <b>1419</b>  | <b>-1.24</b> | <b>0.0000017</b> |
| Ywhag                | 3-monooxygenase/tryptophan 5-monooxygenase activation protein, gamma polypeptide                                                                                                   | 633          | 509         | 1142         | -1.24        | 0.0000229        |
| Nhs1                 | NHS-like 1                                                                                                                                                                         | 1720         | 1395        | 3115         | -1.23        | 0.0000000        |
| Eef1a2               | Eukaryotic translation elongation factor 1 alpha 2                                                                                                                                 | 1659         | 1343        | 3002         | -1.23        | 0.0000000        |
| Myl7                 | Myosin, light polypeptide 7, regulatory                                                                                                                                            | 816          | 659         | 1475         | -1.23        | 0.0000022        |
| Bag3                 | Bcl2-associated athanogene 3                                                                                                                                                       | 682          | 554         | 1236         | -1.23        | 0.0000274        |
| Pfkm                 | Phosphofructokinase, muscle                                                                                                                                                        | 407          | 329         | 736          | -1.23        | 0.0008667        |
| Mm.412722            | Transcribed locus                                                                                                                                                                  | 398          | 323         | 721          | -1.23        | 0.0013215        |
| <b>Ldhb</b>          | <b>Lactate dehydrogenase B</b>                                                                                                                                                     | <b>5358</b>  | <b>4361</b> | <b>9719</b>  | <b>-1.22</b> | <b>0.0000000</b> |
| Pcbp2                | Poly(rC) binding protein 2                                                                                                                                                         | 1164         | 949         | 2113         | -1.22        | 0.0000001        |
| <b>Etfdh</b>         | <b>Electron transferring flavoprotein, dehydrogenase</b>                                                                                                                           | <b>3369</b>  | <b>2767</b> | <b>6136</b>  | <b>-1.21</b> | <b>0.0000000</b> |
| Hexb                 | hexosaminidase B (beta polypeptide)                                                                                                                                                | 3116         | 2561        | 5677         | -1.21        | 0.0000000        |
| Ndrp2                | N-myc downstream regulated gene 2                                                                                                                                                  | 1428         | 1177        | 2605         | -1.21        | 0.0000000        |
| Actn2                | Actinin alpha 2                                                                                                                                                                    | 1264         | 1041        | 2305         | -1.21        | 0.0000001        |
| Nppa                 | Natriuretic peptide precursor type A                                                                                                                                               | 978          | 804         | 1782         | -1.21        | 0.0000020        |
| Lbh                  | Limb-bud and heart                                                                                                                                                                 | 738          | 607         | 1345         | -1.21        | 0.0000373        |
| App                  | Amyloid beta (A4) precursor protein                                                                                                                                                | 677          | 556         | 1233         | -1.21        | 0.0000720        |
| Trdn                 | Triadin                                                                                                                                                                            | 568          | 468         | 1036         | -1.21        | 0.0003321        |
| Pdk2                 | Pyruvate dehydrogenase kinase, isoenzyme 2                                                                                                                                         | 544          | 449         | 993          | -1.21        | 0.0005750        |
| Prei4                | Preimplantation protein 4                                                                                                                                                          | 422          | 346         | 768          | -1.21        | 0.0014866        |
| Sucla2               | Succinate-Coenzyme A ligase, ADP-forming, beta subunit                                                                                                                             | 422          | 346         | 768          | -1.21        | 0.0014866        |
| Pja2                 | Praja 2, RING-H2 motif containing                                                                                                                                                  | 404          | 332         | 736          | -1.21        | 0.0021989        |
| Fth1                 | Ferritin heavy chain 1                                                                                                                                                             | 9825         | 8148        | 17973        | -1.2         | 0.0000000        |
| Nola3                | Nucleolar protein family A, member 3                                                                                                                                               | 635          | 529         | 1164         | -1.2         | 0.0003666        |
| Mm.445729            | Transcribed locus, moderately similar to XP_001082071.1 similar to NADH-ubiquinone oxidoreductase chain 1 (NADH dehydrogenase subunit 1) [Macaca mulatta]                          | 8032         | 6743        | 14775        | -1.19        | 0.0000000        |
| Kif5b                | Kinesin family member 5B                                                                                                                                                           | 715          | 598         | 1313         | -1.19        | 0.0002260        |
| Sorbs2               | Sorbin and SH3 domain containing 2                                                                                                                                                 | 671          | 560         | 1231         | -1.19        | 0.0002727        |
| Slc25a20             | Solute carrier family 25 (mitochondrial carnitine/acylcarnitine translocase), member 20                                                                                            | 501          | 418         | 919          | -1.19        | 0.0018187        |
| Pde4dip              | Phosphodiesterase 4D interacting protein (myomegalin)                                                                                                                              | 1952         | 1656        | 3608         | -1.17        | 0.0000000        |
| C1qbp                | Complement component 1, q subcomponent binding protein                                                                                                                             | 661          | 562         | 1223         | -1.17        | 0.0013356        |
| <b>Sdha</b>          | <b>Succinate dehydrogenase complex, subunit A, flavoprotein (Fp)</b>                                                                                                               | <b>2001</b>  | <b>1712</b> | <b>3713</b>  | <b>-1.16</b> | <b>0.0000001</b> |
| <b>1500032D16Rik</b> | <b>RIKEN cDNA 1500032D16 gene</b>                                                                                                                                                  | <b>1711</b>  | <b>1487</b> | <b>3198</b>  | <b>-1.15</b> | <b>0.0000080</b> |
| <b>Ndufa10</b>       | <b>NADH dehydrogenase (ubiquinone) 1 alpha subcomplex 10</b>                                                                                                                       | <b>1475</b>  | <b>1273</b> | <b>2748</b>  | <b>-1.15</b> | <b>0.0000138</b> |
| <b>Uqcrc1</b>        | <b>Ubiquinol-cytochrome c reductase core protein 1</b>                                                                                                                             | <b>3024</b>  | <b>2648</b> | <b>5672</b>  | <b>-1.14</b> | <b>0.0000000</b> |
| Got1                 | Glutamate oxaloacetate transaminase 1, soluble                                                                                                                                     | 2770         | 2417        | 5187         | -1.14        | 0.0000000        |
| <b>Uqcrc2</b>        | <b>Ubiquinol cytochrome c reductase core protein 2</b>                                                                                                                             | <b>2036</b>  | <b>1776</b> | <b>3812</b>  | <b>-1.14</b> | <b>0.0000023</b> |
| Ndufa3               | NADH dehydrogenase (ubiquinone) 1 alpha subcomplex, 3                                                                                                                              | 1847         | 1615        | 3462         | -1.14        | 0.0000099        |
| Serinc1              | Serine incorporator 1                                                                                                                                                              | 1246         | 1084        | 2330         | -1.14        | 0.0001578        |
| <b>Cabc1</b>         | <b>Chaperone, ABC1 activity of bc1 complex like (S. pombe)</b>                                                                                                                     | <b>855</b>   | <b>746</b>  | <b>1601</b>  | <b>-1.14</b> | <b>0.0020589</b> |
| <b>Idh2</b>          | <b>Isocitrate dehydrogenase 2 (NADP+), mitochondrial</b>                                                                                                                           | <b>7034</b>  | <b>6193</b> | <b>13227</b> | <b>-1.13</b> | <b>0.0000000</b> |
| Uba52                | Ubiquitin A-52 residue ribosomal protein fusion product 1                                                                                                                          | 5043         | 4473        | 9516         | -1.12        | 0.0000000        |
| Ndufa11              | NADH dehydrogenase (ubiquinone) 1 alpha subcomplex 11                                                                                                                              | 1188         | 1056        | 2244         | -1.12        | 0.0020218        |
| Mm.450207            | Transcribed locus, strongly similar to XP_001083687.1 similar to guanine nucleotide binding protein, alpha stimulating activity polypeptide 1 isoform c isoform 5 [Macaca mulatta] | 60328        | 53892       | 114220       | -1.11        | 0.0000000        |
| Mm.458391            | CDNA clone IMAGE:3582855                                                                                                                                                           | 61476        | 55335       | 116811       | -1.11        | 0.0000000        |
| <b>Ndufb8</b>        | <b>NADH dehydrogenase (ubiquinone) 1 beta subcomplex 8</b>                                                                                                                         | <b>1428</b>  | <b>1277</b> | <b>2705</b>  | <b>-1.11</b> | <b>0.0012964</b> |
| <b>Cox5a</b>         | <b>Cytochrome c oxidase, subunit Va</b>                                                                                                                                            | <b>10008</b> | <b>9112</b> | <b>19120</b> | <b>-1.09</b> | <b>0.0000000</b> |
| <b>Mdh1</b>          | <b>Malate dehydrogenase 1, NAD (soluble)</b>                                                                                                                                       | <b>8665</b>  | <b>7896</b> | <b>16561</b> | <b>-1.09</b> | <b>0.0000000</b> |
| Ldb3                 | LIM domain binding 3                                                                                                                                                               | 2579         | 2345        | 4924         | -1.09        | 0.0003162        |
| <b>Ndufb9</b>        | <b>NADH dehydrogenase (ubiquinone) 1 beta subcomplex, 9</b>                                                                                                                        | <b>7015</b>  | <b>6539</b> | <b>13554</b> | <b>-1.07</b> | <b>0.0000221</b> |

|               |                                                                                                                                                                                                         |             |             |              |             |                  |
|---------------|---------------------------------------------------------------------------------------------------------------------------------------------------------------------------------------------------------|-------------|-------------|--------------|-------------|------------------|
| Mm.384744     | Transcribed locus, weakly similar to NP_149931.1 dehydrogenase subunit 1 [Trichosurus vulpecula]                                                                                                        | 30097       | 28966       | 59063        | -1.03       | 0.0000352        |
| Hist1h1e      | Histone cluster 1, H1e                                                                                                                                                                                  | 8           | 0           | 8            | 0           | 0.0001520        |
| 4633401B06Rik | RIKEN cDNA 2810453106 gene                                                                                                                                                                              | 7           | 0           | 7            | 0           | 0.0003924        |
| Rfc5          | Replication factor C (activator 1) 5                                                                                                                                                                    | 6           | 0           | 6            | 0           | 0.0010131        |
| Atp2a2        | ATPase, Ca++ transporting, cardiac muscle, slow twitch 2<br>Osteoclast-like cell cDNA, RIKEN full-length enriched library, clone:1420007J21 product:unclassifiable, full insert sequence                | 22324       | 22712       | 45036        | 1.01        | 0.0004510        |
| Mm.455357     |                                                                                                                                                                                                         | 22977       | 24255       | 47232        | 1.05        | 0.0000000        |
| 2900073G15Rik | RIKEN cDNA 2900073G15 gene                                                                                                                                                                              | 4281        | 4501        | 8782         | 1.05        | 0.0006374        |
| <b>Ndufs2</b> | <b>NADH dehydrogenase (ubiquinone) Fe-S protein 2</b>                                                                                                                                                   | <b>4596</b> | <b>4898</b> | <b>9494</b>  | <b>1.06</b> | <b>0.0000144</b> |
| <b>Uqcr</b>   | <b>Ubiquinol-cytochrome c reductase (6.4kD) subunit</b>                                                                                                                                                 | <b>4888</b> | <b>5287</b> | <b>10175</b> | <b>1.08</b> | <b>0.0000001</b> |
| Aco2          | Aconitase 2, mitochondrial                                                                                                                                                                              | 3320        | 3596        | 6916         | 1.08        | 0.0000063        |
| Laptm4a       | Lysosomal-associated protein transmembrane 4A                                                                                                                                                           | 1641        | 1780        | 3421         | 1.08        | 0.0012611        |
| Atp5c1        | ATP synthase, H+ transporting, mitochondrial F1 complex, gamma polypeptide 1                                                                                                                            | 4556        | 4991        | 9547         | 1.09        | 0.0000000        |
| Slc25a4       | Solute carrier family 25 (mitochondrial carrier, adenine nucleotide translocator), member 4                                                                                                             | 16696       | 18493       | 35189        | 1.1         | 0.0000000        |
| Ivns1abp      | Influenza virus NS1A binding protein                                                                                                                                                                    | 1688        | 1863        | 3551         | 1.1         | 0.0000927        |
| Dcn           | Decorin                                                                                                                                                                                                 | 1430        | 1575        | 3005         | 1.1         | 0.0004214        |
| Mm.441437     | CDNA clone IMAGE:40049146                                                                                                                                                                               | 414361      | 460800      | 875161       | 1.11        | 0.0000000        |
| Ckmt2         | Creatine kinase, mitochondrial 2                                                                                                                                                                        | 6978        | 7832        | 14810        | 1.12        | 0.0000000        |
| <b>Ndufc1</b> | <b>NADH dehydrogenase (ubiquinone) 1, subcomplex unknown, 1</b>                                                                                                                                         | <b>1609</b> | <b>1818</b> | <b>3427</b>  | <b>1.12</b> | <b>0.0000031</b> |
| <b>Sdhb</b>   | <b>Succinate dehydrogenase complex, subunit B, iron sulfur (lp)</b>                                                                                                                                     | <b>1697</b> | <b>1902</b> | <b>3599</b>  | <b>1.12</b> | <b>0.0000077</b> |
| Pdlim5        | Enigma-like PDZ and LIM domains protein                                                                                                                                                                 | 983         | 1109        | 2092         | 1.12        | 0.0003352        |
| Atp5b         | ATP synthase, H+ transporting mitochondrial F1 complex, beta subunit                                                                                                                                    | 9401        | 10694       | 20095        | 1.13        | 0.0000000        |
| Sepp1         | Selenoprotein P, plasma, 1                                                                                                                                                                              | 1263        | 1429        | 2692         | 1.13        | 0.0000305        |
| Rac1          | RAS-related C3 botulinum substrate 1                                                                                                                                                                    | 906         | 1029        | 1935         | 1.13        | 0.0002777        |
| Rps5          | Ribosomal protein S5                                                                                                                                                                                    | 830         | 944         | 1774         | 1.13        | 0.0004424        |
| Tmsb4x        | Thymosin, beta 4, X chromosome                                                                                                                                                                          | 724         | 823         | 1547         | 1.13        | 0.0010391        |
| Rps10         | Ribosomal protein S10                                                                                                                                                                                   | 715         | 813         | 1528         | 1.13        | 0.0011205        |
| Slmap         | Sarcolemma associated protein                                                                                                                                                                           | 781         | 898         | 1679         | 1.14        | 0.0002291        |
| D10Jhu81e     | DNA segment, Chr 10, Johns Hopkins University 81 expressed                                                                                                                                              | 646         | 738         | 1384         | 1.14        | 0.0013710        |
| Tmem109       | Transmembrane protein 109                                                                                                                                                                               | 569         | 653         | 1222         | 1.14        | 0.0017870        |
| Uqcrq         | Ubiquinol-cytochrome c reductase, complex III subunit VII                                                                                                                                               | 5061        | 5850        | 10911        | 1.15        | 0.0000000        |
| Ndufs4        | NADH dehydrogenase (ubiquinone) Fe-S protein 4                                                                                                                                                          | 1118        | 1290        | 2408         | 1.15        | 0.0000060        |
| Prnp          | Prion protein                                                                                                                                                                                           | 606         | 698         | 1304         | 1.15        | 0.0010408        |
| <b>Cox5b</b>  | <b>Cytochrome c oxidase, subunit Vb</b>                                                                                                                                                                 | <b>1401</b> | <b>1633</b> | <b>3034</b>  | <b>1.16</b> | <b>0.0000001</b> |
| Paip2         | Polyadenylate-binding protein-interacting protein 2<br>Transcribed locus, weakly similar to XP_001098128.1 corticosteroid binding globulin isoform 2 [Macaca mulatta]                                   | 581         | 677         | 1258         | 1.16        | 0.0005148        |
| Mm.458030     |                                                                                                                                                                                                         | 84387       | 98925       | 183312       | 1.17        | 0.0000000        |
| Timp3         | Tissue inhibitor of metalloproteinase 3                                                                                                                                                                 | 960         | 1132        | 2092         | 1.17        | 0.0000016        |
| Pgk1          | Phosphoglycerate kinase 1                                                                                                                                                                               | 803         | 944         | 1747         | 1.17        | 0.0000161        |
| Eef1g         | Eukaryotic translation elongation factor 1 gamma                                                                                                                                                        | 694         | 812         | 1506         | 1.17        | 0.0001011        |
| Deb1          | Differentially expressed in B16F10 1                                                                                                                                                                    | 553         | 649         | 1202         | 1.17        | 0.0004039        |
| Chpt1         | Choline phosphotransferase 1                                                                                                                                                                            | 540         | 635         | 1175         | 1.17        | 0.0004086        |
| Sln           | Sarcolipin                                                                                                                                                                                              | 455         | 535         | 990          | 1.17        | 0.0012078        |
| Srp14         | Signal recognition particle 14                                                                                                                                                                          | 604         | 713         | 1317         | 1.18        | 0.0001210        |
| Ly6c1         | Lymphocyte antigen 6 complex, locus C1                                                                                                                                                                  | 505         | 597         | 1102         | 1.18        | 0.0003692        |
| <b>Prdx6</b>  | <b>Peroxiredoxin 6</b>                                                                                                                                                                                  | <b>404</b>  | <b>478</b>  | <b>882</b>   | <b>1.18</b> | <b>0.0013616</b> |
| Fabp3         | Fatty acid binding protein 3, muscle and heart                                                                                                                                                          | 12502       | 14978       | 27480        | 1.19        | 0.0000000        |
| Rpl32         | Ribosomal protein L32                                                                                                                                                                                   | 1385        | 1650        | 3035         | 1.19        | 0.0000000        |
| Psm2          | Proteasome (prosome, macropain) subunit, alpha type 2                                                                                                                                                   | 587         | 702         | 1289         | 1.19        | 0.0000438        |
| Lamp2         | Lysosomal-associated membrane protein 2                                                                                                                                                                 | 539         | 644         | 1183         | 1.19        | 0.0001103        |
| <b>Sord</b>   | <b>Sorbitol dehydrogenase</b>                                                                                                                                                                           | <b>463</b>  | <b>551</b>  | <b>1014</b>  | <b>1.19</b> | <b>0.0004975</b> |
| Ugp2          | UDP-glucose pyrophosphorylase 2                                                                                                                                                                         | 403         | 481         | 884          | 1.19        | 0.0008363        |
| Pln           | Phospholamban                                                                                                                                                                                           | 13426       | 16119       | 29545        | 1.2         | 0.0000000        |
| Cox7b         | cytochrome c oxidase subunit 7B, mitochondrial                                                                                                                                                          | 6247        | 7539        | 13786        | 1.2         | 0.0000000        |
| 2010107E04Rik | RIKEN cDNA 2010107E04 gene                                                                                                                                                                              | 4411        | 5297        | 9708         | 1.2         | 0.0000000        |
| Grin1a        | Glutamate receptor, ionotropic, N-methyl D-aspartate-like 1A<br>Adult male corpora quadrigemina cDNA, RIKEN full-length enriched library, clone:B230350D20 product:unclassifiable, full insert sequence | 543         | 653         | 1196         | 1.2         | 0.0000489        |
| Mm.455364     |                                                                                                                                                                                                         | 8806        | 10698       | 19504        | 1.21        | 0.0000000        |
| Tpm1          | Tropomyosin 1, alpha                                                                                                                                                                                    | 5885        | 7178        | 13063        | 1.21        | 0.0000000        |
| Shfm1         | Split hand/foot malformation (ectrodactyly) type 1<br>Transcribed locus, weakly similar to NP_042565.1 dehydrogenase subunit 4 [Chlamydomonas reinhardtii]                                              | 1009        | 1222        | 2231         | 1.21        | 0.0000000        |
| Mm.458422     |                                                                                                                                                                                                         | 876         | 1062        | 1938         | 1.21        | 0.0000001        |
| Drr1          | Developmentally regulated repeat element-containing transcript 1                                                                                                                                        | 570         | 691         | 1261         | 1.21        | 0.0000154        |

|               |                                                                                                                            |      |       |       |      |           |
|---------------|----------------------------------------------------------------------------------------------------------------------------|------|-------|-------|------|-----------|
| Apobec2       | Apolipoprotein B editing complex 2                                                                                         | 367  | 446   | 813   | 1.21 | 0.0004820 |
| Ndufa2        | NADH dehydrogenase (ubiquinone) 1 alpha subcomplex, 2                                                                      | 349  | 423   | 772   | 1.21 | 0.0006887 |
| Ndufa6        | NADH dehydrogenase (ubiquinone) 1 alpha subcomplex, 6 (B14)                                                                | 3196 | 3914  | 7110  | 1.22 | 0.0000000 |
| Cpe           | Carboxypeptidase E                                                                                                         | 380  | 464   | 844   | 1.22 | 0.0002817 |
| Txnl1         | Thioredoxin-like 1                                                                                                         | 271  | 333   | 604   | 1.22 | 0.0015049 |
| Kpna4         | Karyopherin (importin) alpha 4                                                                                             | 249  | 306   | 555   | 1.22 | 0.0021976 |
| Prkar1a       | Protein kinase, cAMP dependent regulatory, type I, alpha                                                                   | 456  | 561   | 1017  | 1.23 | 0.0000317 |
| Uqcrcfs1      | Ubiquinol-cytochrome c reductase, Rieske iron-sulfur polypeptide 1                                                         | 1753 | 2178  | 3931  | 1.24 | 0.0000000 |
| Atp5j2        | ATP synthase, H+ transporting, mitochondrial F0 complex, subunit f, isoform 2                                              | 1461 | 1814  | 3275  | 1.24 | 0.0000000 |
| Art3          | ADP-ribosyltransferase 3                                                                                                   | 842  | 1052  | 1894  | 1.24 | 0.0000000 |
| Smyd1         | SET and MYND domain containing 1                                                                                           | 414  | 514   | 928   | 1.24 | 0.0000336 |
| Cops4         | COP9 constitutive photomorphogenic homolog subunit 4                                                                       | 254  | 316   | 570   | 1.24 | 0.0010555 |
| Ndufb6        | NADH dehydrogenase (ubiquinone) 1 beta subcomplex, 6                                                                       | 691  | 868   | 1559  | 1.25 | 0.0000000 |
| 0610008C08Rik | RIKEN cDNA 0610008C08 gene                                                                                                 | 495  | 621   | 1116  | 1.25 | 0.0000023 |
| B2m           | Beta-2 microglobulin                                                                                                       | 362  | 453   | 815   | 1.25 | 0.0000665 |
| Lypla1        | Lysophospholipase 1                                                                                                        | 330  | 414   | 744   | 1.25 | 0.0001083 |
| Cdc42         | Cell division cycle 42 homolog (S. cerevisiae)                                                                             | 282  | 354   | 636   | 1.25 | 0.0003708 |
| Mm.429298     | Transcribed locus                                                                                                          | 264  | 332   | 596   | 1.25 | 0.0004811 |
| Chchd7        | Coiled-coil-helix-coiled-coil-helix domain containing 7                                                                    | 264  | 331   | 595   | 1.25 | 0.0005273 |
| Cebpd         | CCAAT/enhancer binding protein (C/EBP), delta                                                                              | 251  | 316   | 567   | 1.25 | 0.0005935 |
| H2-K1         | Histocompatibility 2, K1, K region                                                                                         | 519  | 659   | 1178  | 1.26 | 0.0000003 |
| Mm.395009     | Transcribed locus, moderately similar to XP_001086547.1 mitochondrial trifunctional protein, beta subunit [Macaca mulatta] | 461  | 583   | 1044  | 1.26 | 0.0000023 |
| Ccng1         | Cyclin G1                                                                                                                  | 1058 | 1350  | 2408  | 1.27 | 0.0000000 |
| Ndufb10       | NADH dehydrogenase (ubiquinone) 1 beta subcomplex, 10                                                                      | 704  | 896   | 1600  | 1.27 | 0.0000000 |
| Car14         | Carbonic anhydrase 14                                                                                                      | 299  | 381   | 680   | 1.27 | 0.0000815 |
| Mcf2          | Multiple coagulation factor deficiency 2                                                                                   | 253  | 323   | 576   | 1.27 | 0.0002672 |
| Gm561         | Gene model 561, (NCBI)                                                                                                     | 255  | 324   | 579   | 1.27 | 0.0003690 |
| Rpl14         | Ribosomal protein L14                                                                                                      | 526  | 678   | 1204  | 1.28 | 0.0000000 |
| Serpinb6a     | Serine (or cysteine) peptidase inhibitor, clade B, member 6a                                                               | 235  | 302   | 537   | 1.28 | 0.0003025 |
| Eif3k         | Eukaryotic translation initiation factor 3, subunit K                                                                      | 207  | 265   | 472   | 1.28 | 0.0008681 |
| Bag2          | Bcl2-associated athanogene 2                                                                                               | 176  | 227   | 403   | 1.28 | 0.0014949 |
| Usmg5         | Upregulated during skeletal muscle growth 5                                                                                | 9100 | 11754 | 20854 | 1.29 | 0.0000000 |
| Ghitm         | Growth hormone inducible transmembrane protein                                                                             | 1098 | 1422  | 2520  | 1.29 | 0.0000000 |
| Ensa          | Endosulfine alpha                                                                                                          | 624  | 808   | 1432  | 1.29 | 0.0000000 |
| Mrpl12        | Mitochondrial ribosomal protein L12                                                                                        | 199  | 257   | 456   | 1.29 | 0.0006420 |
| Phyh          | Phytanoyl-CoA hydroxylase                                                                                                  | 1704 | 2223  | 3927  | 1.3  | 0.0000000 |
| Them2         | Thioesterase superfamily member 2                                                                                          | 746  | 975   | 1721  | 1.3  | 0.0000000 |
| Rab18         | RAB18, member RAS oncogene family                                                                                          | 415  | 542   | 957   | 1.3  | 0.0000003 |
| Sf3b1         | Splicing factor 3b, subunit 1                                                                                              | 337  | 440   | 777   | 1.3  | 0.0000038 |
| Fech          | Ferrochelatase                                                                                                             | 299  | 389   | 688   | 1.3  | 0.0000206 |
| Prpf39        | PRP39 pre-mRNA processing factor 39 homolog (yeast)                                                                        | 147  | 192   | 339   | 1.3  | 0.0019728 |
| Prdx5         | Peroxisome oxidoreductin 5                                                                                                 | 672  | 883   | 1555  | 1.31 | 0.0000000 |
| Vdac3         | Voltage-dependent anion channel 3                                                                                          | 620  | 817   | 1437  | 1.31 | 0.0000000 |
| Mrpl54        | Mitochondrial ribosomal protein L54                                                                                        | 260  | 341   | 601   | 1.31 | 0.0000449 |
| Mm.380875     | Transcribed locus                                                                                                          | 241  | 316   | 557   | 1.31 | 0.0000775 |
| Stx4a         | Syntaxin 4A (placental)                                                                                                    | 171  | 225   | 396   | 1.31 | 0.0007260 |
| 2310003L22Rik | RIKEN cDNA 2310003L22 gene                                                                                                 | 171  | 225   | 396   | 1.31 | 0.0008087 |
| Pcbd2         | Pterin 4 alpha carbinolamine dehydratase/dimerization cofactor of hepatocyte nuclear factor 1 alpha (TCF1) 2               | 151  | 200   | 351   | 1.32 | 0.0010326 |
| Ndufb5        | NADH dehydrogenase (ubiquinone) 1 beta subcomplex, 5                                                                       | 838  | 1117  | 1955  | 1.33 | 0.0000000 |
| Rabgap11      | RAB GTPase activating protein 1-like                                                                                       | 207  | 277   | 484   | 1.33 | 0.0000771 |
| Dpt           | Dermatopontin                                                                                                              | 212  | 283   | 495   | 1.33 | 0.0000771 |
| Acta2         | Actin, alpha 2, smooth muscle, aorta                                                                                       | 148  | 198   | 346   | 1.33 | 0.0009772 |
| Mrpl13        | Mitochondrial ribosomal protein L13                                                                                        | 568  | 764   | 1332  | 1.34 | 0.0000000 |
| Arl6ip5       | ADP-ribosylation factor-like 6 interacting protein 5                                                                       | 198  | 267   | 465   | 1.34 | 0.0000751 |
| Fuca2         | Fucosidase, alpha-L- 2, plasma                                                                                             | 196  | 264   | 460   | 1.34 | 0.0000793 |
| Nit2          | Nitrilase family, member 2                                                                                                 | 128  | 172   | 300   | 1.34 | 0.0015341 |
| Ndufab1       | NADH dehydrogenase (ubiquinone) 1 alpha subcomplex, 7 (B14.5a)                                                             | 1784 | 2424  | 4208  | 1.35 | 0.0000000 |
| Dohh          | Deoxyhypusine hydroxylase/monooxygenase                                                                                    | 243  | 329   | 572   | 1.35 | 0.0000074 |
| Lsmd1         | LSM domain containing 1                                                                                                    | 210  | 285   | 495   | 1.35 | 0.0000261 |

|               |                                                                                             |             |             |             |             |                  |
|---------------|---------------------------------------------------------------------------------------------|-------------|-------------|-------------|-------------|------------------|
| Smyd2         | SET and MYND domain containing 2                                                            | 204         | 276         | 480         | 1.35        | 0.0000419        |
| 2310056P07Rik | RIKEN cDNA 2310056P07 gene                                                                  | 624         | 849         | 1473        | 1.36        | 0.0000000        |
| Cryab         | Crystallin, alpha B                                                                         | 542         | 741         | 1283        | 1.36        | 0.0000000        |
| Hccs          | Holocytochrome c synthetase                                                                 | 325         | 444         | 769         | 1.36        | 0.0000001        |
| 0610012G03Rik | RIKEN cDNA 0610012G03 gene                                                                  | 183         | 250         | 433         | 1.36        | 0.0000575        |
| Gata6         | GATA binding protein 6                                                                      | 179         | 244         | 423         | 1.36        | 0.0000796        |
| Atp5g3        | ATP synthase, H+ transporting, mitochondrial F0 complex, subunit c (subunit 9), isoform 3   | 13417       | 18434       | 31851       | 1.37        | 0.0000000        |
| 2310028O11Rik | RIKEN cDNA 2310028O11 gene                                                                  | 1347        | 1857        | 3204        | 1.37        | 0.0000000        |
| Dstn          | Destrin                                                                                     | 426         | 587         | 1013        | 1.37        | 0.0000000        |
| Rnf128        | Ring finger protein 128                                                                     | 125         | 172         | 297         | 1.37        | 0.0007105        |
| Rxrg          | Retinoid X receptor gamma                                                                   | 108         | 149         | 257         | 1.37        | 0.0016458        |
| <b>Atpif1</b> | <b>ATPase inhibitory factor 1</b>                                                           | <b>1024</b> | <b>1421</b> | <b>2445</b> | <b>1.38</b> | <b>0.0000000</b> |
| Hspb8         | Heat shock protein 8                                                                        | 470         | 650         | 1120        | 1.38        | 0.0000000        |
| Hmgn1         | High mobility group nucleosomal binding domain 1                                            | 212         | 293         | 505         | 1.38        | 0.0000096        |
| Ipo7          | Importin 7                                                                                  | 309         | 431         | 740         | 1.39        | 0.0000000        |
| Bcl2l13       | BCL2-like 13 (apoptosis facilitator)                                                        | 271         | 378         | 649         | 1.39        | 0.0000002        |
| Calm2         | Calmodulin 2                                                                                | 197         | 275         | 472         | 1.39        | 0.0000101        |
| Thbd          | Thrombomodulin                                                                              | 166         | 232         | 398         | 1.39        | 0.0000491        |
| Usp14         | Ubiquitin specific peptidase 14                                                             | 152         | 212         | 364         | 1.39        | 0.0000937        |
| 2410006H16Rik | RIKEN cDNA 2410006H16 gene                                                                  | 115         | 160         | 275         | 1.39        | 0.0008553        |
| Coq10b        | Coenzyme Q10 homolog B (S. cerevisiae)                                                      | 294         | 413         | 707         | 1.4         | 0.0000000        |
| Smpx          | Small muscle protein, X-linked                                                              | 202         | 284         | 486         | 1.4         | 0.0000049        |
| Vps26a        | Vacuolar protein sorting 26 homolog A (yeast)                                               | 149         | 210         | 359         | 1.4         | 0.0000761        |
| Ccng2         | Cyclin G2                                                                                   | 113         | 159         | 272         | 1.4         | 0.0006113        |
| Tnni3         | Troponin I, cardiac                                                                         | 8417        | 11937       | 20354       | 1.41        | 0.0000000        |
| Slc25a5       | Solute carrier family 25 (mitochondrial carrier, adenine nucleotide translocator), member 5 | 930         | 1313        | 2243        | 1.41        | 0.0000000        |
| Tspo          | Translocator protein                                                                        | 294         | 415         | 709         | 1.41        | 0.0000000        |
| Mrpl23        | Mitochondrial ribosomal protein L23                                                         | 154         | 218         | 372         | 1.41        | 0.0000415        |
| 5730437N04Rik | RIKEN cDNA 2310061104 gene                                                                  | 134         | 189         | 323         | 1.41        | 0.0001473        |
| <b>Glrx</b>   | <b>Glutaredoxin</b>                                                                         | <b>105</b>  | <b>151</b>  | <b>256</b>  | <b>1.43</b> | <b>0.0004096</b> |
| Lum           | Lumican                                                                                     | 249         | 359         | 608         | 1.44        | 0.0000000        |
| MyI2          | Myosin, light polypeptide 2, regulatory, cardiac, slow                                      | 4674        | 6793        | 11467       | 1.45        | 0.0000000        |
| Fhl2          | Four and a half LIM domains 2                                                               | 3404        | 4944        | 8348        | 1.45        | 0.0000000        |
| Tmem50b       | Transmembrane protein 50B                                                                   | 106         | 154         | 260         | 1.45        | 0.0002674        |
| <b>Txnrd1</b> | <b>Thioredoxin reductase 1</b>                                                              | <b>196</b>  | <b>287</b>  | <b>483</b>  | <b>1.46</b> | <b>0.0000003</b> |
| 5730536A07Rik | RIKEN cDNA 2310056P07 gene                                                                  | 128         | 187         | 315         | 1.46        | 0.0000419        |
| Capns1        | Calpain, small subunit 1                                                                    | 96          | 141         | 237         | 1.46        | 0.0003565        |
| <b>Asph</b>   | <b>Aspartate-beta-hydroxylase</b>                                                           | <b>244</b>  | <b>361</b>  | <b>605</b>  | <b>1.47</b> | <b>0.0000000</b> |
| Tmbim4        | Transmembrane BAX inhibitor motif containing 4                                              | 191         | 282         | 473         | 1.47        | 0.0000003        |
| Spcs1         | Signal peptidase complex subunit 1 homolog (S. cerevisiae)                                  | 132         | 195         | 327         | 1.47        | 0.0000196        |
| Atp6v1b2      | ATPase, H+ transporting, lysosomal V1 subunit B2                                            | 109         | 161         | 270         | 1.47        | 0.0000957        |
| Psmb5         | Proteasome (prosome, macropain) subunit, beta type 5                                        | 806         | 1196        | 2002        | 1.48        | 0.0000000        |
| <b>Ndufc2</b> | <b>NADH dehydrogenase (ubiquinone) 1, subcomplex unknown, 2</b>                             | <b>639</b>  | <b>950</b>  | <b>1589</b> | <b>1.48</b> | <b>0.0000000</b> |
| Kremen1       | Kringle containing transmembrane protein 1                                                  | 285         | 422         | 707         | 1.48        | 0.0000000        |
| Ube2e1        | Ubiquitin-conjugating enzyme E2E 1, UBC4/5 homolog (yeast)                                  | 152         | 226         | 378         | 1.48        | 0.0000024        |
| 0610009B22Rik | RIKEN cDNA 0610009B22 gene                                                                  | 110         | 163         | 273         | 1.48        | 0.0000612        |
| Psmb6         | Proteasome (prosome, macropain) subunit, beta type 6                                        | 105         | 156         | 261         | 1.48        | 0.0001153        |
| 2610001J05Rik | RIKEN cDNA 2610001J05 gene                                                                  | 95          | 141         | 236         | 1.48        | 0.0002337        |
| Ppp1ca        | Protein phosphatase 1, catalytic subunit, alpha isoform                                     | 417         | 622         | 1039        | 1.49        | 0.0000000        |
| Map2k1ip1     | Mitogen-activated protein kinase kinase 1 interacting protein 1                             | 259         | 387         | 646         | 1.49        | 0.0000000        |
| Itga6         | Integrin alpha 6                                                                            | 67          | 100         | 167         | 1.49        | 0.0014445        |
| Snx2          | Sorting nexin 2                                                                             | 71          | 107         | 178         | 1.5         | 0.0010183        |
| 1100001H23Rik | RIKEN cDNA 1100001H23 gene                                                                  | 68          | 102         | 170         | 1.5         | 0.0014182        |
| Tek           | Endothelial-specific receptor tyrosine kinase                                               | 72          | 109         | 181         | 1.51        | 0.0008592        |
| Grb14         | Growth factor receptor bound protein 14                                                     | 658         | 1006        | 1664        | 1.52        | 0.0000000        |
| Mid1ip1       | Mid1 interacting protein 1 (gastrulation specific G12-like (zebrafish))                     | 69          | 105         | 174         | 1.52        | 0.0007600        |
| Hbxip         | Hepatitis B virus x interacting protein                                                     | 97          | 149         | 246         | 1.53        | 0.0000510        |
| Ppp1r3c       | Protein phosphatase 1, regulatory (inhibitor) subunit 3C                                    | 67          | 103         | 170         | 1.53        | 0.0006613        |
| Cish          | Cytokine inducible SH2-containing protein                                                   | 62          | 95          | 157         | 1.53        | 0.0012864        |
| A230075M04Rik | RIKEN cDNA 5730437N04 gene                                                                  | 128         | 198         | 326         | 1.54        | 0.0000022        |

|               |                                                                                                                                                           |       |       |       |      |           |
|---------------|-----------------------------------------------------------------------------------------------------------------------------------------------------------|-------|-------|-------|------|-----------|
| Il1r1         | Interleukin 1 receptor, type I                                                                                                                            | 143   | 222   | 365   | 1.55 | 0.0000004 |
| Ell2          | Elongation factor RNA polymerase II 2                                                                                                                     | 78    | 121   | 199   | 1.55 | 0.0001471 |
| Tceal1        | Transcription elongation factor A (SII)-like 1                                                                                                            | 56    | 87    | 143   | 1.55 | 0.0018490 |
| Zcchc14       | Zinc finger, CCHC domain containing 14                                                                                                                    | 52    | 81    | 133   | 1.55 | 0.0022332 |
| Josd2         | Josephin domain containing 2                                                                                                                              | 62    | 97    | 159   | 1.56 | 0.0009354 |
| Mm.390478     | Transcribed locus, moderately similar to XP_001097441.1 similar to Cytochrome c oxidase polypeptide VIc precursor [Macaca mulatta]                        | 431   | 679   | 1110  | 1.57 | 0.0000000 |
| Lhfp          | Lipoma HMGIC fusion partner                                                                                                                               | 175   | 276   | 451   | 1.57 | 0.0000000 |
| Arl6ip2       | ADP-ribosylation factor-like 6 interacting protein 2                                                                                                      | 83    | 131   | 214   | 1.57 | 0.0000462 |
| Mm.392391     | Transcribed locus                                                                                                                                         | 167   | 265   | 432   | 1.58 | 0.0000000 |
| BC031181      | CDNA sequence BC031181                                                                                                                                    | 55    | 87    | 142   | 1.58 | 0.0009643 |
| Rorc          | RAR-related orphan receptor gamma                                                                                                                         | 236   | 377   | 613   | 1.59 | 0.0000000 |
| Mm.465439     | Adult male corpora quadrigemina cDNA, RIKEN full-length enriched library, clone:B230033O15 product:Warning: possibly chimeric clone, full insert sequence | 107   | 172   | 279   | 1.6  | 0.0000017 |
| Skiv2l2       | Superkiller viralicidal activity 2-like 2 (S. cerevisiae)                                                                                                 | 88    | 141   | 229   | 1.6  | 0.0000170 |
| Cldn12        | Claudin 12                                                                                                                                                | 55    | 88    | 143   | 1.6  | 0.0008140 |
| Mm.447910     | Adult male corpora quadrigemina cDNA, RIKEN full-length enriched library, clone:B230315J10 product:unclassifiable, full insert sequence                   | 15006 | 24300 | 39306 | 1.61 | 0.0000000 |
| Pkig          | Protein kinase inhibitor, gamma                                                                                                                           | 222   | 359   | 581   | 1.61 | 0.0000000 |
| Med21         | Mediator complex subunit 21                                                                                                                               | 203   | 330   | 533   | 1.62 | 0.0000000 |
| Rnf34         | Ring finger protein 34                                                                                                                                    | 78    | 127   | 205   | 1.62 | 0.0000232 |
| Eid1          | EP300 interacting inhibitor of differentiation 1                                                                                                          | 160   | 263   | 423   | 1.64 | 0.0000000 |
| Herc3         | Hect domain and RLD 3                                                                                                                                     | 71    | 117   | 188   | 1.64 | 0.0000450 |
| Blvrb         | Biliverdin reductase B (flavin reductase (NADPH))                                                                                                         | 56    | 92    | 148   | 1.64 | 0.0004098 |
| Setdb2        | SET domain, bifurcated 2                                                                                                                                  | 43    | 71    | 114   | 1.65 | 0.0013331 |
| Gadd45gip1    | Growth arrest and DNA-damage-inducible, gamma interacting protein 1                                                                                       | 129   | 215   | 344   | 1.66 | 0.0000000 |
| Lix1l         | Lix1-like                                                                                                                                                 | 61    | 102   | 163   | 1.67 | 0.0000708 |
| Hcfc1r1       | Host cell factor C1 regulator 1 (XPO1-dependent)                                                                                                          | 92    | 155   | 247   | 1.68 | 0.0000011 |
| Sdhd          | Succinate dehydrogenase complex, subunit D, integral membrane protein                                                                                     | 109   | 185   | 294   | 1.69 | 0.0000001 |
| Aspn          | Asporin                                                                                                                                                   | 50    | 85    | 135   | 1.7  | 0.0001870 |
| Cnbp          | Cellular nucleic acid binding protein                                                                                                                     | 307   | 531   | 838   | 1.72 | 0.0000000 |
| Tbk1          | TANK-binding kinase 1                                                                                                                                     | 55    | 95    | 150   | 1.72 | 0.0000652 |
| Art4          | ADP-ribosyltransferase 4                                                                                                                                  | 115   | 201   | 316   | 1.74 | 0.0000000 |
| Mm.60041      | 15 days embryo embryonic body below diaphragm cDNA, RIKEN full-length enriched library, clone:8230401F05 product:unclassifiable, full insert sequence     | 201   | 355   | 556   | 1.76 | 0.0000000 |
| Ccl2          | Chemokine (C-C motif) receptor-like 2                                                                                                                     | 77    | 136   | 213   | 1.76 | 0.0000008 |
| Mm.427661     | Transcribed locus, moderately similar to XP_001090091.1 similar to 60S ribosomal protein L32 [Macaca mulatta]                                             | 67    | 118   | 185   | 1.76 | 0.0000046 |
| Marveld1      | MARVEL (membrane-associating) domain containing 1                                                                                                         | 34    | 60    | 94    | 1.76 | 0.0009613 |
| Fmr1          | Fragile X mental retardation syndrome 1 homolog                                                                                                           | 32    | 57    | 89    | 1.78 | 0.0013811 |
| Bche          | Butyrylcholinesterase                                                                                                                                     | 53    | 95    | 148   | 1.79 | 0.0000237 |
| A930005H10Rik | RIKEN cDNA A930005H10 gene                                                                                                                                | 40    | 72    | 112   | 1.8  | 0.0003402 |
| Tusc2         | Tubulin, beta 2c                                                                                                                                          | 35    | 63    | 98    | 1.8  | 0.0006699 |
| 4833439L19Rik | RIKEN cDNA 4833439L19 gene                                                                                                                                | 58    | 105   | 163   | 1.81 | 0.0000067 |
| Mm.455390     | Transcribed locus, weakly similar to NP_039499.1 c oxidase 1 [Schizosaccharomyces pombe]                                                                  | 56    | 102   | 158   | 1.82 | 0.0000117 |
| Rras          | Harvey rat sarcoma oncogene, subgroup R                                                                                                                   | 35    | 64    | 99    | 1.82 | 0.0004460 |
| Igsf1         | Immunoglobulin superfamily, member 1                                                                                                                      | 29    | 53    | 82    | 1.82 | 0.0010167 |
| Hfe           | Hemochromatosis                                                                                                                                           | 29    | 54    | 83    | 1.86 | 0.0006617 |
| Rgs2          | Regulator of G-protein signaling 2                                                                                                                        | 142   | 269   | 411   | 1.89 | 0.0000000 |
| Tmod4         | Tropomodulin 4                                                                                                                                            | 28    | 53    | 81    | 1.89 | 0.0007936 |
| Tppp3         | Tubulin polymerization-promoting protein family member 3                                                                                                  | 36    | 69    | 105   | 1.91 | 0.0001053 |
| Mm.420899     | Transcribed locus, moderately similar to XP_001084755.1 similar to mitochondrial ribosomal protein 63 [Macaca mulatta]                                    | 27    | 52    | 79    | 1.92 | 0.0007650 |
| Megf9         | Multiple EGF-like-domains 9                                                                                                                               | 26    | 50    | 76    | 1.92 | 0.0011429 |
| Ptdss1        | Phosphatidylserine synthase 1                                                                                                                             | 33    | 64    | 97    | 1.93 | 0.0001392 |
| Fkbp7         | FK506 binding protein 7                                                                                                                                   | 38    | 74    | 112   | 1.94 | 0.0000307 |
| Fcgr3         | Fc receptor, IgG, low affinity III                                                                                                                        | 29    | 57    | 86    | 1.96 | 0.0002179 |
| 2310073E15Rik | RIKEN cDNA 2310073E15 gene                                                                                                                                | 25    | 49    | 74    | 1.96 | 0.0008821 |
| Mm.403476     | Transcribed locus                                                                                                                                         | 41    | 81    | 122   | 1.97 | 0.0000121 |
| Pxmp3         | Peroxisomal membrane protein 3                                                                                                                            | 83    | 166   | 249   | 2    | 0.0000000 |
| H2-Ab1        | Histocompatibility 2, class II antigen A, beta 1                                                                                                          | 20    | 40    | 60    | 2    | 0.0021065 |
| Mm.237238     | Malonyl-CoA decarboxylase                                                                                                                                 | 54    | 111   | 165   | 2.05 | 0.0000001 |
| Tmem37        | Transmembrane protein 37                                                                                                                                  | 21    | 44    | 65    | 2.09 | 0.0005392 |
| Aradc4        | Arrestin domain containing 4                                                                                                                              | 38    | 80    | 118   | 2.1  | 0.0000031 |
| Ppp1r3b       | Protein phosphatase 1, regulatory (inhibitor) subunit 3B                                                                                                  | 22    | 47    | 69    | 2.13 | 0.0002170 |



|               |                                                                                                                        |     |      |      |      |           |
|---------------|------------------------------------------------------------------------------------------------------------------------|-----|------|------|------|-----------|
| Gch1          | GTP cyclohydrolase 1                                                                                                   | 35  | 75   | 110  | 2.14 | 0.0000023 |
| Eef1b2        | Eukaryotic translation elongation factor 1 beta 2                                                                      | 23  | 50   | 73   | 2.17 | 0.0001424 |
| 1110019K23Rik | RIKEN cDNA 1110019K23 gene                                                                                             | 17  | 37   | 54   | 2.17 | 0.0007906 |
| Mm.393589     | CDNA, clone:Y0G0121O19, strand:minus, reference:ENSEMBL:Mouse-Transcript-ENST:ENSMUST00000047864, based on BLAT search | 23  | 51   | 74   | 2.21 | 0.0000863 |
| Nup62         | Nucleoporin 62                                                                                                         | 22  | 49   | 71   | 2.22 | 0.0001022 |
| Zfp704        | Zinc finger protein 704                                                                                                | 546 | 1253 | 1799 | 2.29 | 0.0000000 |
| Rps26         | Ribosomal protein L26                                                                                                  | 169 | 399  | 568  | 2.36 | 0.0000000 |
| Gng11         | Guanine nucleotide binding protein (G protein), gamma 11                                                               | 56  | 134  | 190  | 2.39 | 0.0000000 |
| Ap4s1         | Adaptor-related protein complex AP-4, sigma 1                                                                          | 54  | 134  | 188  | 2.48 | 0.0000000 |
| Sec23b        | SEC23B (S. cerevisiae)                                                                                                 | 12  | 32   | 44   | 2.66 | 0.0003060 |
| Egln2         | EGL nine homolog 2 (C. elegans)                                                                                        | 13  | 36   | 49   | 2.76 | 0.0000607 |
| 2210408F21Rik | RIKEN cDNA 2210408F21 gene                                                                                             | 9   | 25   | 34   | 2.77 | 0.0011310 |
| Gls2          | glutaminase 2 (liver, mitochondrial)                                                                                   | 8   | 24   | 32   | 3    | 0.0012970 |
| Cd151         | CD151 antigen                                                                                                          | 48  | 165  | 213  | 3.43 | 0.0000000 |
| Ube1c         | Ubiquitin-activating enzyme E1C                                                                                        | 6   | 21   | 27   | 3.5  | 0.0004854 |
| Dse           | Dermatan sulfate epimerase                                                                                             | 5   | 19   | 24   | 3.8  | 0.0007230 |
| Hrasls        | HRAS-like suppressor                                                                                                   | 3   | 14   | 17   | 4.66 | 0.0010096 |
| Stbd1         | Starch binding domain 1                                                                                                | 3   | 15   | 18   | 5    | 0.0015510 |
| AW060394      | expressed sequence AW060394                                                                                            | 3   | 21   | 24   | 7    | 0.0000050 |

## Supplemental Table 2. Quantification of mRNA expression levels by RT-PCR array

At early phase (4 weeks) after deletion of Txnip in temporally-inducible cardiomyocyte-specific Txnip-KO mice

| NCBI Unigen Symbol | Gene Name                                                | 2 <sup>Δ</sup> -ΔC <sub>t</sub> |               | Cardiac-KO /Control<br>Fold Up- or Down-Regulation | p-value      |        |
|--------------------|----------------------------------------------------------|---------------------------------|---------------|----------------------------------------------------|--------------|--------|
|                    |                                                          | Cardiac-KO (n=3)                | Control (n=3) |                                                    |              |        |
| <i>Pcx</i>         | <i>Pyruvate carboxylase</i>                              | <b>0.014</b>                    | <b>0.026</b>  | <b>-1.943</b>                                      | <b>0.005</b> | p<0.01 |
| <i>Idh2</i>        | <i>Isocitrate dehydrogenase 2 (NADP+), mitochondrial</i> | <b>3.666</b>                    | <b>4.482</b>  | <b>-1.223</b>                                      | <b>0.047</b> | p<0.05 |
| Pdk4               | Pyruvate dehydrogenase kinase, isozyme 4                 | 2.071                           | 0.976         | 2.122                                              | 0.048        | p<0.05 |
| Phkg2              | Phosphorylase kinase gamma 2                             | 0.033                           | 0.040         | -1.218                                             | 0.019        | p<0.05 |
| Bpgm               | 2,3-Biphosphoglycerate mutase                            | 0.038                           | 0.030         | 1.246                                              | 0.020        | p<0.05 |
| Gbe1               | Glucan (1,4-alpha-), branching enzyme 1                  | 0.315                           | 0.252         | 1.251                                              | 0.023        | p<0.05 |
| 4833426J09Rik      | Riken cDNA 4833426J09                                    | 0.015                           | 0.025         | -1.674                                             | 0.048        | p<0.05 |

At late phase (15 weeks) after deletion of Txnip in temporally-inducible cardiomyocyte-specific Txnip-KO mice

| NCBI Unigen Symbol | Gene Name                                                | 2 <sup>Δ</sup> -ΔC <sub>t</sub> |               | Cardiac-KO /Control<br>Fold Up- or Down-Regulation | p-value      |        |
|--------------------|----------------------------------------------------------|---------------------------------|---------------|----------------------------------------------------|--------------|--------|
|                    |                                                          | Cardiac-KO (n=3)                | Control (n=3) |                                                    |              |        |
| <i>Pcx</i>         | <i>Pyruvate carboxylase</i>                              | <b>0.023</b>                    | <b>0.033</b>  | <b>-1.443</b>                                      | <b>0.035</b> | p<0.05 |
| <i>Idh2</i>        | <i>Isocitrate dehydrogenase 2 (NADP+), mitochondrial</i> | <b>4.222</b>                    | <b>5.225</b>  | <b>-1.238</b>                                      | <b>0.039</b> | p<0.05 |
| Idh3a              | Isocitrate dehydrogenase 3 (NAD+) alpha                  | 2.783                           | 2.464         | 1.129                                              | 0.031        | p<0.05 |
| Phkg1              | Phosphorylase kinase gamma 1                             | 0.067                           | 0.051         | 1.334                                              | 0.035        | p<0.05 |
| Aldob              | Aldolase B, fructose-bisphosphate                        | 0.001                           | 0.001         | 1.458                                              | 0.022        | p<0.05 |
| Gck                | Glucokinase                                              | 0.027                           | 0.041         | -1.498                                             | 0.020        | p<0.05 |
| Hk3                | Hexokinase 3                                             | 0.001                           | 0.001         | 1.531                                              | 0.048        | p<0.05 |
| Suclg1             | Succinate-CoA lgase, GDP-forming, alpha subunit          | 1.056                           | 0.917         | 1.152                                              | 0.015        | p<0.05 |

Wild type mice (Txnip<sup>+/+</sup>) at 4 weeks after 4-hydroxy-tamoxifen (4OHT) treatment

| NCBI Unigen Symbol | Gene Name                                         | 2 <sup>Δ</sup> -ΔC <sub>t</sub> |               | 4OHT /Vehicle<br>Fold Up- or Down-Regulation | p-value |        |
|--------------------|---------------------------------------------------|---------------------------------|---------------|----------------------------------------------|---------|--------|
|                    |                                                   | 4OHT (n=3)                      | Vehicle (n=3) |                                              |         |        |
| Pcx                | Pyruvate carboxylase                              | 0.025                           | 0.027         | -1.092                                       | 0.304   | p=NS   |
| Idh2               | Isocitrate dehydrogenase 2 (NADP+), mitochondrial | 6.044                           | 6.436         | -1.065                                       | 0.489   | p=NS   |
| Pdk4               | Pyruvate dehydrogenase kinase, isozyme 4          | 0.834                           | 0.690         | 1.209                                        | 0.582   | p=NS   |
| Phkg2              | Phosphorylase kinase gamma 2                      | 0.036                           | 0.034         | 1.065                                        | 0.756   | p=NS   |
| Bpgm               | 2,3-Biphosphoglycerate mutase                     | 0.050                           | 0.053         | -1.063                                       | 0.700   | p=NS   |
| Gbe1               | Glucan (1,4-alpha-), branching enzyme 1           | 0.193                           | 0.154         | 1.251                                        | 0.556   | p=NS   |
| 4833426J09Rik      | Riken cDNA 4833426J09                             | 0.027                           | 0.027         | 1.015                                        | 0.961   | p=NS   |
| Idh3a              | Isocitrate dehydrogenase 3 (NAD+) alpha           | 2.202                           | 1.678         | 1.313                                        | 0.332   | p=NS   |
| Phkg1              | Phosphorylase kinase gamma 1                      | 0.031                           | 0.033         | -1.041                                       | 0.794   | p=NS   |
| Aldob              | Aldolase B, fructose-bisphosphate                 | 0.001                           | 0.000         | 1.226                                        | 0.117   | p=NS   |
| Gck                | Glucokinase                                       | 0.062                           | 0.055         | 1.130                                        | 0.264   | p=NS   |
| Hk3                | Hexokinase 3                                      | 0.002                           | 0.003         | -1.358                                       | 0.043   | p<0.05 |
| Suclg1             | Succinate-CoA lgase, GDP-forming, alpha subunit   | 1.317                           | 0.889         | 1.482                                        | 0.158   | p=NS   |

Supplemental Table 3: Proteomic analysis for novel binding partners of Txnip in human cells

| Protein Name                                                         | Accession number | MW (Da) | Txnip | GST |
|----------------------------------------------------------------------|------------------|---------|-------|-----|
| Carbonyl reductase [NADPH] 1                                         | IPI00295386      | 30362   | 290   | 263 |
| Isoform 1 of Alpha-1-antitrypsin                                     | IPI00553177      | 46725   | 57    |     |
| Apolipoprotein A-I                                                   | IPI00021841      | 30766   | 47    |     |
| Alpha-2-macroglobulin                                                | IPI00478003      | 163287  | 34    |     |
| Isoform 1 of Tuftelin-interacting protein 11                         | IPI00015924      | 96819   | 32    | 12  |
| Isoform A of GC-rich sequence DNA-binding factor homolog             | IPI00001364      | 104802  | 31    | 21  |
| Haptoglobin                                                          | IPI00902590      | 45193   | 28    |     |
| Probable ATP-dependent RNA helicase DDX41                            | IPI00007208      | 69830   | 27    | 14  |
| IGKC protein                                                         | IPI00909649      | 25632   | 24    |     |
| Isoform 1 of Protein disulfide-isomerase A6                          | IPI00644989      | 48109   | 23    |     |
| Putative pre-mRNA-splicing factor ATP-dependent RNA helicase DHX15   | IPI00396435      | 90929   | 18    | 8   |
| Complement component 4B                                              | IPI00887154      | 192765  | 17    |     |
| Isoform 1 of Alpha-1-antichymotrypsin                                | IPI00847635      | 47639   | 16    |     |
| Complement C3 (Fragment)                                             | IPI00783987      | 187163  | 15    |     |
| IGHV3OR16-13 IGHA1 protein                                           | IPI00061977      | 54144   | 13    |     |
| Tubulin alpha-1B chain                                               | IPI00387144      | 19360   | 11    | 8   |
| IGL protein                                                          | IPI00154742      | 24778   | 10    |     |
| Splicing factor 3B subunit 4                                         | IPI00017339      | 44373   | 10    | 8   |
| Inter-alpha (globulin) inhibitor H4                                  | IPI00896419      | 103360  | 9     |     |
| IGHG1 protein                                                        | IPI00448925      | 60092   | 8     |     |
| Splicing factor 45                                                   | IPI00176706      | 44950   | 8     | 7   |
| Ceruloplasmin                                                        | IPI00017601      | 122201  | 7     |     |
| Splicing factor 3 subunit 1                                          | IPI00017451      | 88887   | 7     | 5   |
| Apolipoprotein A-IV precursor                                        | IPI00847179      | 45368   | 6     |     |
| Hemopexin                                                            | IPI00022488      | 51664   | 6     |     |
| Isoform 1 of Serine/arginine repetitive matrix protein 1             | IPI00647720      | 102331  | 5     | 4   |
| cDNA FLJ55673, highly similar to Complement factor B                 | IPI00019591      | 140947  | 4     |     |
| alpha 1B-glycoprotein precursor                                      | IPI00745089      | 54242   | 3     |     |
| Isoform 1 of Gelsolin                                                | IPI00026314      | 85694   | 3     |     |
| Hemoglobin subunit beta                                              | IPI00654755      | 15982   | 3     |     |
| Plastin 3                                                            | IPI00216694      | 70802   | 3     |     |
| Thioredoxin domain containing 5 isoform 2                            | IPI00395646      | 43658   | 3     |     |
| Vitronectin                                                          | IPI00298971      | 54296   | 3     |     |
| cDNA FLJ60715, highly similar to Pyruvate carboxylase, mitochondrial | IPI00909014      | 57916   | 2     |     |
| Alpha-fetoprotein                                                    | IPI00022443      | 68673   | 2     |     |
| Isoform 1 of Complement factor H                                     | IPI00029739      | 139095  | 2     |     |
| Isoform 2 of Eukaryotic translation initiation factor 3 subunit B    | IPI00719752      | 99036   | 2     |     |
| Inter-alpha (Globulin) inhibitor H2                                  | IPI00645038      | 105216  | 2     |     |
| Cleavage and polyadenylation specificity factor subunit 5            | IPI00646917      | 26213   | 2     |     |
| cDNA FLJ58826, highly similar to Plasma protease C1 inhibitor        | IPI00879931      | 59484   | 2     |     |
| Serotransferrin                                                      | IPI00022463      | 77039   | 2     |     |

Values are numbers of hits by mass spectrometry
